1     **Functional interdependence of the actin nucleator Cobl and Cobl-like**  
2                                   **in dendritic arbor development**

3  
4     Maryam Izadi<sup>1</sup>, Eric Seemann<sup>1</sup>, Dirk Schlobinski<sup>1</sup>, Lukas Schwintzer<sup>1</sup>, Britta Qualmann<sup>1\*</sup>, Michael  
5     M. Kessels<sup>1\*</sup>

6  
7     <sup>1</sup> Institute of Biochemistry I, Jena University Hospital/Friedrich-Schiller-University Jena, 07743 Jena,  
8     Germany

9  
10    \* Correspondence

11    [Britta.Qualmann@med.uni-jena.de](mailto:Britta.Qualmann@med.uni-jena.de) & [Michael.Kessels@med.uni-jena.de](mailto:Michael.Kessels@med.uni-jena.de)

12  
13    **Short title**

14    Functional interdependence of Cobl and Cobl-like

15

16    **Character count:** 359396 characters incl. spaces (main text)

17

18 **Abstract**

19 Local actin filament formation is indispensable for development of the dendritic arbor of neurons. We  
20 show that, surprisingly, the action of single actin filament-promoting factors was insufficient for  
21 powering dendritogenesis. Instead, this process required the actin nucleator Cobl and its only  
22 evolutionary distant ancestor Cobl-like acting interdependently. This coordination between Cobl-like  
23 and Cobl was achieved by physical linkage by syndapin I. Syndapin I formed nanodomains at convex  
24 plasma membrane areas at the base of protrusive structures and interacted with three motifs in Cobl-  
25 like, one of which was  $Ca^{2+}$ /calmodulin-regulated. Consistently, syndapin I, Cobl-like's newly  
26 identified N terminal calmodulin-binding site and the single  $Ca^{2+}$ /calmodulin-responsive syndapin-  
27 binding motif all were critical for Cobl-like's functions. In dendritic arbor development, local  
28  $Ca^{2+}$ /CaM-controlled actin dynamics thus relies on regulated and physically coordinated interactions  
29 of different F-actin formation-promoting factors and only together they have the power to bring about  
30 the sophisticated neuronal morphologies required for neuronal network formation.

31

## 32 **Introduction**

33 The actin cytoskeleton is crucial for a huge variety of key processes in cell biology. Yet, only few  
34 factors were found that can promote the *de novo* formation of actin filaments (Chesarone & Goode  
35 2009; Qualmann & Kessels, 2009). Thus, the initial idea that each of the discovered actin nucleators  
36 may be responsible for the formation of specific, perhaps tissue or cell-type-specific F-actin  
37 structures obviously had to be dismissed as too simple. Theoretically, the required functional  
38 diversity in actin filament formation despite a limited set of powerful effectors could be achieved by  
39 combinatorial mechanisms specific for a given cell biological process. However, experimental  
40 evidence for such combinatorial actions of actin nucleators still is very sparse. On top of that, which  
41 mechanisms may orchestrate these powerful effectors to bring about a certain cellular processes also  
42 remains a fundamental question in cell biology.

43 Neurons need to extend elaborate cellular protrusions - the single signal-sending axon and multiple  
44 signal-receiving, highly branched dendrites - to form neuronal networks. These very demanding and  
45 specialized cellular morphogenesis processes are driven by the actin cytoskeleton (Kessels et al.,  
46 2011). The formation of the dendritic arbor involves local  $\text{Ca}^{2+}$  and calmodulin (CaM) signals  
47 coinciding with transient F-actin formation by the evolutionary young actin nucleator Cobl (Cordon-  
48 bleu) (Ahuja et al., 2007) at dendritic branch induction sites (Hou et al., 2015).  $\text{Ca}^{2+}$ /CaM regulates  
49 both Cobl's loading with monomeric actin and its different modes of plasma membrane association  
50 (Hou et al., 2015). Cobl is furthermore regulated via arginine methylation by PRMT2 (Hou et al.,  
51 2018). All of these aspects were required for Cobl's crucial role in dendritic arbor formation (Ahuja  
52 et al., 2007; Haag et al., 2012; Hou et al., 2015, Hou et al., 2018).

53 Interestingly, also Cobl's evolutionary distant ancestor Cobl-like (COBLL1; Coblr1) was recently  
54 discovered to be important for  $\text{Ca}^{2+}$ /CaM-controlled neuromorphogenesis (Izadi et al., 2018). While  
55 Cobl uses three Wiskott-Aldrich syndrome protein Homology 2 (WH2) domains to nucleate actin

56 (Ahuja et al., 2007), Cobl-like employs a unique combinatory mechanism of G-actin binding by its  
57 single, C-terminal WH2 domain and  $\text{Ca}^{2+}$ /CaM-promoted association with the actin-binding protein  
58 Abp1 (Kessels et al., 2000) to promote F-actin formation (Izadi et al., 2018). Cobl-like was also  
59 found to interact with Cyclin-dependent kinase 1 and to shape prostate cancer cells by not yet fully  
60 clear mechanisms (Takayama et al., 2018).

61 Here we show that Cobl and Cobl-like work at the same nascent dendritic branch sites in a strictly  
62 interdependent manner choreographed by physically bridging by the membrane-binding F-BAR  
63 protein syndapin I (Qualmann et al., 1999; Itoh et al., 2005; Dharmalingam et al., 2009; Schwintzer et  
64 al., 2011), which we identified to interact with Cobl-like and to specifically occur in nanoclusters at  
65 the convex membrane surfaces at the base of nascent membrane protrusions of developing neurons.  
66 The finding that one of the three syndapin binding sites of Cobl-like was regulated by  $\text{Ca}^{2+}$ /CaM  
67 unveiled a further important mechanism of local control and coordination of actin dynamics in  
68 neuromorphogenesis.

69 Our work thereby provides insights into how two actin filament formation-promoting components -  
70 each critical for dendritic arbor formation - power actin-mediated dendritic branch initiation in a  
71 strictly coordinated manner and how this process can be directly linked to local membrane shaping to  
72 give rise to the complex morphologies required for proper neuronal network formation.

73

74 **Results**

75 **Cobl-like and the actin nucleator Cobl work at the same dendritic branching sites and largely**  
76 **phenocopy each other in their critical role in dendritic arborization**

77 The actin nucleator Cobl and its evolutionary ancestor protein Cobl-like are molecularly quite distinct  
78 (**Figure 1–figure supplement 1**), however, both critical for dendritic arbor formation (Ahuja et al.,  
79 2007; Izadi et al., 2018). Side-by-side loss-of-function analysis of both factors in developing primary  
80 hippocampal neurons using IMARIS software-based evaluations for detailed analyses of the elaborate  
81 morphology of such cells (Izadi et al., 2018) revealed surprisingly similar phenotypes (**Figure 1A-G**).  
82 Dendritic branch and terminal point numbers as well as total dendritic length all were severely  
83 affected by lack of Cobl-like (**Figure 1A-G**). Corresponding Cobl loss-of-function showed that,  
84 while dendritic growth processes seemed largely unaffected by Cobl deficiency, also Cobl deficiency  
85 led to a significant reduction of terminal points and in particular to severe loss of dendritic branch  
86 points. With -35%, these defects were about as strong as those caused by Cobl-like RNAi (**Figure**  
87 **1D-F**). Cobl RNAi mostly affected Sholl intersections in proximal areas. Cobl-like RNAi led to  
88 reduced Sholl intersections throughout the dendritic arbor (**Figure 1G**).

89 The phenotypical comparison of Cobl and Cobl-like unveiled that both cytoskeletal effectors have  
90 somewhat similar functions in dendritic arborization. Colocalization studies showed that Flag-  
91 mCherry-Cobl and GFP-Cobl-like did not show any obvious spatial segregation (neither in proximal  
92 nor in peripheral dendritic arbor of developing neurons) but largely colocalized. Dendritic  
93 accumulations of Cobl usually showed corresponding albeit less pronounced accumulations of Cobl-  
94 like (**Figure 1H,I**; arrows). This suggested that Cobl and Cobl-like are not responsible for distinct  
95 branching sites but work at the same sites.

96

97 **Cobl-like functions in dendritic arborization strictly depend on Cobl and likewise Cobl**  
98 **functions depend on Cobl-like**

99 Two powerful molecular machines for actin filament formation at the same place may either reflect  
100 function redundancy or parallel action to drive cellular processes effectively in response to  
101 (putatively different) signaling cues or may even reflect interlinked functions. Functional redundancy  
102 seemed unlikely, because both individual loss-of-function phenotypes were severe (Cobl, -33%;  
103 Cobl-like, -39%) (**Figure 1D**). Thus, we focused on the remaining hypotheses.

104 Interestingly, Cobl-like-driven dendritic arborization was completely impaired by the lack of Cobl  
105 (**Figure 2A-G**). Dendritic branch point numbers, terminal point numbers and the total dendritic arbor  
106 length of neurons cotransfected with GFP-Cobl-like and Cobl RNAi all were highly statistically  
107 significantly below those of neurons cotransfected with Cobl-like and scrambled RNAi. The  
108 suppression of the Cobl-like gain-of-function effects by Cobl RNAi was so strong that under the  
109 chosen condition (34 h expression; GFP coexpression) all three parameters were indistinguishable  
110 from control levels and therefore permitted the conclusion that the effects reflected a full suppression  
111 of Cobl-like's functions in dendritic branching in the absence of Cobl (**Figure 2E-G**).

112 To our surprise, likewise, also Cobl-promoted dendritic arbor formation turned out to be massively  
113 affected by absence of Cobl-like (**Figure 2H-K**). The dendritic parameters of developing neurons  
114 expressing Cobl and Cobl-like RNAi did not show any Cobl gain-of-function phenotype but were  
115 statistically not significantly different from those of control or Cobl-like RNAi (**Figure 2L-N**). Thus,  
116 Cobl functions in dendritic arbor formation clearly depended on Cobl-like.

117 Taken together, Cobl and Cobl-like both are cellular factors promoting actin filament formation and  
118 significantly differ in their properties, yet, in dendritic branch formation, they do not work  
119 independently but surprisingly strictly depend on each other.

120

## 121 **Cobl-like associates with syndapins**

122 The surprising functional interdependence of Cobl and Cobl-like in dendritic arbor formation raised  
123 the question how this may be organized mechanistically with two proteins that seem to employ quite  
124 different molecular mechanisms (Ahuja et al., 2007; Izadi et al., 2018).

125 Using a variety of different methods, we failed to observe any obvious interactions of Cobl and Cobl-  
126 like (our unpublished efforts; also see below). Thus, the crosstalk of Cobl-like and Cobl had to be less  
127 direct and more sophisticated.

128 Cobl was demonstrated to use complexly choreographed membrane binding mechanisms involving  
129 its direct binding partner syndapin I (Schwintzer et al., 2011; Hou et al., 2015). Syndapins can self-  
130 associate (Kessels and Qualmann, 2006) and could therefore theoretically link Cobl and Cobl-like  
131 physically. As a prerequisite, syndapin I would have to associate with Cobl-like. Indeed, GFP-Cobl-  
132 like specifically coprecipitated with immobilized syndapin I SH3 domain. The interaction was  
133 mediated by N terminal proline-rich regions of Cobl-like (**Figure 3A**) and was conserved among  
134 syndapin I, syndapin II and syndapin III (**Figure 3B**).

135 *In vitro* reconstitutions with purified components proved that syndapin I/Cobl-like interactions were  
136 direct (**Figure 3C**) and were furthermore based on classical SH3 domain/PxxP motif interactions, as  
137 proven by using a P434L-mutated SH3 domain (**Figure 3–figure supplement 1A**).

138 Cobl-like deletion mutants (**Figure 3D,E**) showed that specifically three regions in Cobl-like's Cobl  
139 Homology domain (Cobl-like<sup>1-111</sup>, Cobl-like<sup>261-380</sup> and Cobl-like<sup>376-540</sup>) contained syndapin I  
140 interfaces (**Figure 3E, Figure 3–figure supplement 1B**). Each of them has a single “KRAP” motif  
141 (**Figure 1–figure supplement 1**).

142 Specific coimmunoprecipitation of GFP-Cobl-like<sup>1-741</sup> with Flag-tagged syndapin I demonstrated that  
143 the identified interaction can also occur *in vivo* (**Figure 3F**). GFP-Cobl-like<sup>1-741</sup> also specifically  
144 coimmunoprecipitated with Flag-syndapin II-s and Flag-syndapin III (**Figure 3–figure supplement**

145 **1C,D**), i.e. with syndapin family members showing a wider expression than syndapin I (Kessels and  
146 Qualmann, 2004).

147 It was furthermore possible to directly visualize Cobl-like/syndapin I complex formation in intact  
148 cells by demonstrating specific recruitments of GFP-Cobl-like and GFP-Cobl-like<sup>1-741</sup> to  
149 mitochondria decorated with Mito-mCherry-syndapin I (**Figure 3G,H; Figure 3–figure supplement**  
150 **1E**). This firmly excluded postsolubilization artefacts, which theoretically could compromise  
151 biochemical studies. Deletion of the syndapin I SH3 domain (Mito-mCherry-SdpI<sup>ΔSH3</sup>) disrupted  
152 complex formations with both GFP-Cobl-like<sup>1-741</sup> (**Figure 3I**) and GFP-Cobl-like full-length (**Figure**  
153 **3–figure supplement 1F**).

154 Cobl-like/syndapin interactions also are of relevance in the brain, as immobilized, recombinant  
155 TrxHis-tagged Cobl-like specifically precipitated endogenous syndapin I from mouse brain lysates  
156 (**Figure 3J**). Furthermore, endogenous Cobl-like/syndapin I complexes *in vivo* were demonstrated by  
157 coimmunoprecipitation analyses from mouse brain lysates (**Figure 3K**).

158

### 159 **Syndapin I is crucial for Cobl-like's ability to promote dendritic arbor extension and branching**

160 We next addressed whether the identified Cobl-like interaction partner syndapin I would indeed be  
161 critical for Cobl-like's functions. GFP-Cobl-like massively promoted dendritic arborization already  
162 after very short times (Izadi et al., 2018). Strikingly, all Cobl-like gain-of-function phenotypes in  
163 developing primary hippocampal neurons were completely suppressed upon syndapin I RNAi  
164 (**Figure 4C**). Cobl-like-overexpressing neurons cotransfected with syndapin I RNAi showed  
165 dendritic branch points, dendritic terminal points and an overall length of the dendritic arbor that  
166 were highly statistically significantly different from Cobl-like overexpression neurons and indistin-  
167 guishable from those of control cells. The syndapin I RNAi-mediated suppression of Cobl-like  
168 functions occurred in all dendritic arbor parts affected by Cobl-like gain-of-function (**Figure 4D-G**).



169 Cobl-like's functions in dendritic arbor formation thus are fully dependent on the availability of its  
170 direct interaction partner syndapin I.

171

### 172 **Syndapins physically interconnect Cobl-like with Cobl**

173 In order to unravel molecular mechanisms underlying the strict functional interdependence of Cobl  
174 and Cobl-like in dendritic arborization, we asked whether syndapin I may indeed be able to directly  
175 bridge the two actin cytoskeletal effectors. To exclude putative indirect interactions via actin, we used  
176 immobilized GST-Cobl-like<sup>1-411</sup>, which comprises the syndapin binding sites (**Figure 3**). Cobl-like<sup>1-  
177 411</sup> indeed formed specific protein complexes with GFP-Cobl<sup>1-713</sup> when syndapin I was present  
178 (**Figure 5A**). No GFP-Cobl<sup>1-713</sup> was precipitated when syndapin I was omitted. Thus, direct  
179 interactions between Cobl-like and Cobl did not occur but complex formation required syndapin I  
180 acting as a bridge (**Figure 5A**). Likewise, also syndapin III mediated complex formation of Cobl-like  
181 with Cobl (**Figure 5B**).

182 Demonstrating that complexes of all three components are also formed at membranes and in intact  
183 cells Mito-GFP-Cobl<sup>1-713</sup> successfully recruiting syndapin I to mitochondrial membranes (**Figure 5–  
184 figure supplement 1**) also recruited Cobl-like<sup>1-741</sup> (**Figure 5C**). The visualized complex formations  
185 were specific and mediated by syndapin I acting as bridging component between Cobl and Cobl-like,  
186 as omitting syndapin I did not lead to any Cobl-like<sup>1-741</sup> mitochondrial presence and also Mito-GFP  
187 did not lead to any syndapin/Cobl-like colocalization at mitochondria (**Figure 5D,E**).

188

### 189 **Syndapin I and Cobl-like colocalize at sites of dendritic branch induction**

190 In line with the BAR domain hypothesis (Peter et al., 2004; Qualmann et al., 2011; Daumke et al.,  
191 2014; Kessels and Qualmann, 2015; Carman and Dominguez, 2018) syndapin I may sense/induce  
192 certain membrane topologies and thereby provide spatial cues for Cobl and Cobl-like functions. Thus,

193 three syndapin I-related aspects needed to be experimentally addressed: i) Where and when do Cobl-  
194 like and syndapin I occur together in developing neurons? ii) Would a given syndapin I localization  
195 indeed reflect specifically membrane-associated syndapin I? iii) Would putative accumulations of  
196 membrane-associated syndapin I then really correspond to convex membrane topologies?

197 Dual time-lapse imaging of GFP-Cobl-like and syndapin I-mRubyRFP in developing primary  
198 hippocampal neurons showed that syndapin I accumulated in defined spots along dendrites coinciding  
199 with subsequent branch induction events. Such accumulations occurred as early as 1 min prior to  
200 detectable dendritic branch protrusion, were spatially restricted to very small areas (diameters, ~250-  
201 1200 nm) and were spatially and temporally colocalized with Cobl-like at branch initiation sites  
202 **(Figure 6A,B)**.

203 Afterwards, the accumulations of both proteins at the base of newly formed protrusions faded. This  
204 suggested a highly mobile subpool of syndapin I and Cobl-like in the dendritic arbor.

205 Sites with repetitive dendritic protrusion attempts showed accumulations of both syndapin I and  
206 Cobl-like prior to the first as well as prior to the second protrusion initiation **(Figure 6A,B)**.

207

208 **Membrane-bound syndapin I occurs preferentially at protrusive membrane topologies in**  
209 **developing neurons and forms nanoclusters at such sites**

210 3D-time-lapse studies do not resolve whether the observed syndapin I accumulations at nascent  
211 branch sites represent membrane-associated syndapin I or a cytosolic subpool e.g. associated with  
212 putative cytoskeletal components at such sites. Immunogold labeling of freeze-fractured plasma  
213 membranes is a technique that *per se* exclusively focusses on membrane-integrated proteins, provides  
214 membrane topology information, and can be applied to neuronal networks (e.g. see Tanaka et al.,  
215 2005; Holderith et al., 2012; Schneider et al., 2014; Nakamura et al., 2015). We have recently shown

216 that plasma membranes of still developing neurons can in principle be freeze-fractured and  
217 immunolabelled, too (Wolf et al., 2019).

218 Whereas either Cobl nor Cobl-like seemed preserved by the procedure (our unpublished data),  
219 immunogold labeling of syndapin I, which can insert hydrophobic wedges into one membrane leaflet  
220 (Wang et al., 2009), was successfully obtained (**Figure 7A-B**). In principle, anti-syndapin I  
221 immunogold labeling was seen at both cylindrical and protrusive membrane topologies. However,  
222 even at the conditions of saturated labeling applied, cylindrical membrane surfaces merely showed  
223 sparse anti-syndapin I immunogold labeling and were mostly decorated with single gold particles or  
224 by pairs of labels. In contrast, at protrusive sites, the labeling density was about three times as high as  
225 at cylindrical surfaces (**Figure 7A,B**).

226 Protrusive sites also showed a statistically highly significant enrichment of syndapin I nanoclusters  
227 ( $\geq 3$  anti-syndapin I labels in circular ROIs of 35 nm radius) (**Figure 7B-D**). Interestingly, syndapin I  
228 was usually not localized to the tip of the protrusion but preferentially occurred at membrane  
229 topology transition zones at the protrusion base (**Figure 7A''**).

230 The accumulation of syndapin I clusters at such sites was in line with a promotion of membrane  
231 curvature induction and/or with a stabilization of the complex membrane topologies found at such  
232 sites by syndapin I.

233

234 **Cobl-like's N terminus is a target for the  $Ca^{2+}$  sensor CaM and  $Ca^{2+}$  signals increase Cobl-like's**  
235 **associations with syndapin I**

236 The formation of neuronal networks involves local  $Ca^{2+}$  and CaM signals, which coincide with  
237 transient F-actin formation at sites of dendritic branch induction (Hou et al., 2015). Cobl-like was  
238 identified as  $Ca^{2+}$ /CaM target. Yet, this CaM association occurred in the C terminal part of Cobl-like  
239 and regulated Cobl-like's association with the F-actin-binding protein Abp1 (Izadi et al., 2018).

240 Interestingly, also GFP-Cobl-like<sup>1-411</sup> showed Ca<sup>2+</sup>-dependent CaM binding, whereas middle parts,  
241 such as Cobl-like<sup>376-540</sup> and Cobl-like<sup>537-740</sup>, did not (**Figure 8A,B**).

242 Surprisingly, further analyses demonstrated that the central parts of the Cobl Homology domain of  
243 Cobl-like, i.e. Cobl-like<sup>111-262</sup> and Cobl-like<sup>182-272</sup> also both did not show any Ca<sup>2+</sup>-dependent CaM  
244 binding (**Figure 8A,B**), although the central Cobl Homology domain corresponds to the CaM-binding  
245 area in Cobl (Hou et al., 2015) and represents an area of at least moderately higher sequence  
246 conservation between Cobl and Cobl-like (33% identity; **Figure 1–figure supplement 1**). Instead, it  
247 was the most N-terminal part of Cobl-like represented by Cobl-like<sup>1-111</sup> and Cobl-like<sup>1-58</sup> that was  
248 targeted by CaM (**Figure 8A,B**).

249 Coprecipitation experiments with purified recombinant proteins confirmed that Ca<sup>2+</sup>/CaM and  
250 syndapin I can bind Cobl-like<sup>1-411</sup> simultaneously (**Figure 8C**). We hypothesized that the discovered  
251 Ca<sup>2+</sup>/CaM binding to the Cobl-like N terminus may play a role in regulating the syndapin binding of  
252 the neighbored Cobl Homology domain. Quantitative syndapin I coimmunoprecipitation experiments  
253 with Cobl-like<sup>1-741</sup> demonstrated an improved complex formation of Cobl-like with syndapin I when  
254 Ca<sup>2+</sup> was added. With an increase of ~70%, syndapin I binding to Cobl-like<sup>1-741</sup> turned out to be  
255 massively promoted by Ca<sup>2+</sup> (**Figure 8D,E**).

256 Thus, the identified N terminal complex formation with syndapin I is Ca<sup>2+</sup>/CaM-regulated.

257

258 **Cobl-like's N terminal CaM binding site regulating syndapin I association levels is crucial for**  
259 **dendritic arbor formation**

260 The N terminal region of Cobl-like (**Figure 1–figure supplement 1**) indeed contains putative CaM  
261 binding motifs. Coprecipitation analyses clearly showed that, in contrast to GFP-Cobl-like<sup>1-741</sup>, a  
262 corresponding deletion mutant (GFP-Cobl-like<sup>1-741ΔCaM NT</sup>; GFP-Cobl-like<sup>1-741Δ11-45</sup>) did not show any  
263 Ca<sup>2+</sup>-dependent CaM binding (**Figure 9A**).

264 Strikingly, a RNAi-resistant (\*) Cobl-like mutant solely lacking the N terminal CaM binding site  
265 (GFP-Cobl-like\*<sup>ΔCaM NT</sup>) failed to rescue the Cobl-like loss-of-function phenotypes in dendritic  
266 arborization (**Figure 9B,C**). Quantitative analyses unveiled that reexpression of GFP-Cobl-like\*<sup>ΔCaM</sup>  
267 <sup>NT</sup> instead of resupplying the neurons with RNAi-insensitive wild-type Cobl-like\*, which rescued all  
268 Cobl-like deficiency phenotypes, led to defects in dendritic branch point numbers, terminal point  
269 numbers and total dendritic length. These defects were as severe as those caused by Cobl-like RNAi  
270 without rescue attempt (**Figure 9E-F**).

271 Also Sholl analyses confirmed that GFP-Cobl-like\*<sup>ΔCaM NT</sup> showed a significant lack of performance  
272 in all proximal and central parts of the dendritic arbor when compared to Cobl-like RNAi/GFP-Cobl-  
273 like\* (statistically significantly different at all Sholl intersections up to 30 μm) (**Figure 9G**).

274 The identified N terminal CaM binding site of Cobl-like regulating the syndapin I interactions thus  
275 was absolutely indispensable for Cobl-like's functions in dendritic arbor formation.

276

277 **Ca<sup>2+</sup>/CaM signaling exclusively promotes the syndapin I association with the first of the three**  
278 **“KRAP” motifs**

279 The critical N terminal CaM binding site was adjacent to the most N terminal of the three syndapin  
280 binding areas. As a prerequisite for further analyses uncovering the regulatory mechanism, we next  
281 confirmed that the interactions with syndapins were indeed solely mediated by the “KRAP” motif-  
282 containing regions. Both Cobl-like<sup>1-741ΔKRAP</sup> and Cobl-like<sup>ΔKRAP</sup> indeed were not able to interact with  
283 the syndapin I SH3 domain, as shown by coprecipitation studies and by reconstitutions of complex  
284 formations with syndapin I *in vivo* (**Figure 10A,B; Figure 10–figure supplement 1**).

285 Strikingly, quantitative coimmunoprecipitation analyses unveiled a full abolishment of the about 50%  
286 increase of syndapin I interaction with the Cobl Homology domain of Cobl-like (Cobl-like<sup>1-457</sup>) upon  
287 Ca<sup>2+</sup> addition when the first “KRAP” motif (KRAP1) was deleted (Cobl-like<sup>1-457ΔKRAP1</sup>; Cobl-like<sup>1-</sup>

288 <sup>457Δ59-69</sup>) (**Figure 10C-E**). This insensitivity of Cobl-like<sup>1-457ΔKRAP1</sup> to Ca<sup>2+</sup>/CaM signaling revealed  
289 that it was exclusively the first “KRAP” motif (aa59-69) that was regulated by Ca<sup>2+</sup>/CaM signaling.  
290 Side-by-side analyses of GFP-Cobl-like<sup>1-457</sup> and Cobl-like<sup>1-457ΔKRAP1</sup> under Ca<sup>2+</sup>-free control  
291 conditions revealed that without Ca<sup>2+</sup> Cobl-like<sup>1-457</sup> and the corresponding ΔKRAP1 mutant thereof  
292 coimmunoprecipitated the same amount of syndapin I (**Figure 10F,G**). Thus, without Ca<sup>2+</sup> and under  
293 the stringency of *in vivo* conditions, as reflected by coimmunoprecipitations, “KRAP” motif 1  
294 seemed not to contribute to syndapin I complex formation but awaited activation by Ca<sup>2+</sup>/CaM  
295 signaling.

296

297 **The single Ca<sup>2+</sup>/CaM-regulated syndapin I binding site of Cobl-like is crucial for Cobl-like’s**  
298 **function in dendritic arbor formation**

299 In line with the importance of the identified N terminal CaM binding site, also deletion of only the  
300 first, i.e. the Ca<sup>2+</sup>/CaM-regulated, syndapin I binding interface was as detrimental for Cobl-like’s  
301 critical functions in dendritic arborization as lacking the entire N terminal part of Cobl-like all  
302 together (GFP-Cobl-like\*<sup>Δ1-412</sup>). Both GFP-Cobl-like\*<sup>Δ1-412</sup> and GFP-Cobl-like\*<sup>ΔKRAP1</sup> completely  
303 failed to rescue the Cobl-like loss-of-function phenotypes in dendritic arborization (**Figure 10H-J**).  
304 Instead, cotransfections with Cobl-like RNAi in both cases merely led to dendritic morphologies  
305 identical to those of neurons deficient for Cobl-like. The dendritic branch points, terminal points and  
306 total dendritic length all remained significantly reduced in comparison to control neurons (scrambled  
307 RNAi/GFP) and did not differ from those of Cobl-like RNAi neurons (**Figure 10H-J**).  
308 This complete failure to rescue any of the Cobl-like loss-of-function phenotypes in dendritic  
309 arborization demonstrated that the Ca<sup>2+</sup>/CaM-regulated “KRAP” motif 1 of Cobl-like is absolutely  
310 critical for Cobl-like’s functions in dendritic arbor formation.

311 Together, our analyses unveiled that the actin nucleator Cobl and its distant relative Cobl-like - each  
312 of them critical for dendritic arbor formation – in fact need to cooperate with each other in a  
313 syndapin-coordinated and  $\text{Ca}^{2+}$ /CaM-regulated manner to bring about the complex morphology of  
314 hippocampal neurons (**Figure 11**).

315

## 316 **Discussion**

317 Development of proper dendritic arbors of neuronal cells is key for the complex brains of vertebrates,  
318 as neuronal morphologies have direct consequences for brain organization patterns, cell-cell  
319 connectivity and information processing within neuronal networks. Here we show that this  
320 fundamental process is powered by the coordinated, strictly interdependent action of two  
321 components, which both promote the formation of actin filaments at the cell cortex, the actin  
322 nucleator Cobl (Ahuja et al., 2007) and its only distant relative Cobl-like (Izadi et al., 2018).

323 Cobl-like is already present in bilateria and considered as an evolutionary ancestor of the actin  
324 nucleator Cobl. Yet, we did not observe any redundant or additive functions in dendritic arborization  
325 of developing neurons. Instead, Cobl and Cobl-like both enriched at the same nascent dendritic  
326 branching sites and their functions were cooperative and each crucial for dendritic branch induction.  
327 Our findings that Cobl-like interacts with the F-BAR domain protein syndapin I providing links to  
328 Cobl and that the syndapin I-binding N terminal part of Cobl-like is regulated by  $Ca^{2+}$ /CaM signaling  
329 in a positive manner unveil the mechanisms of the striking functional interdependence of Cobl and  
330 Cobl-like (**Figure 11**).

331 The identified syndapin/Cobl-like interactions were mediated by three “KRAP” motif-containing  
332 regions in Cobl-like and the SH3 domain of syndapin I. Cobl-like’s “KRAP” motifs are highly  
333 conserved among each other and among different species (consensus, Kr+APxpP). They furthermore  
334 show similarity to those of Cobl (consensus, KrRAPpPP) (Schwintzer et al., 2011), as well as to other  
335 mapped syndapin I binding sites, such as RRQAPPPP in dynamin I (Anggono and Robinson, 2007),  
336 RKKAPPPPKR in ProSAP1/Shank2 (Schneider et al., 2014), and KKPPPAKPVIP in the glycine  
337 receptor beta subunit (del Pino et al., 2014).

338 Coprecipitation of endogenous syndapin I with Cobl-like from brain extracts,  
339 coimmunoprecipitations of endogenous Cobl-like and syndapin I from mouse brain lysates as well as



340 visual proof of complex formation in intact cells underscore the *in vivo*-relevance of the Cobl-  
341 like/syndapin I interactions we identified.

342 Syndapin I/Cobl-like interactions clearly were of functional importance, as syndapin I deficiency  
343 completely suppressed Cobl-like-mediated dendritic arbor formation. In line, syndapin I accumulated  
344 together with Cobl-like at nascent dendritic branch sites and membrane-bound syndapin I clusters  
345 were found at convex membrane curvatures at the base of protrusions in developing neurons. With  
346 their topology changes in different directions, these membrane areas fit the structure of the  
347 membrane-binding F-BAR domain of syndapin I, which seems unique among the BAR protein  
348 superfamily (Qualmann et al., 2011) and shows overall curvature but also a strongly kinked tilde  
349 shape (Wang et al., 2009).

350 We furthermore demonstrated biochemically and in intact cells that Cobl-like and Cobl can  
351 physically be interconnected by syndapin I acting as a bridge. Physical interconnection of Cobl and  
352 Cobl-like by syndapin I provides a plausible molecular mechanism for the striking functional  
353 interdependence of Cobl and Cobl-like and is in line with syndapin I/Cobl interactions (Schwintzer et  
354 al., 2011) as well as with syndapin I's F-BAR domain-mediated self-association ability (Kessels and  
355 Qualmann, 2006; Shimada et al., 2007; Wang et al., 2009) (**Figure 11**). This would leave the SH3  
356 domain of each syndapin I free for recruiting effector proteins, for spatially organizing them at  
357 specific, curved membrane areas at nascent dendritic branch sites and for thereby coordinating their  
358 functions in dendritic branch induction.

359 Importantly, we found that the interlinkage of Cobl-like and Cobl was not static. The Cobl-  
360 like/syndapin I interaction was regulated by  $Ca^{2+}$  signals. This is well in line with the involvement of  
361 transient, local  $Ca^{2+}$  signals in dendritic arborization of developing neurons (Rajan & Cline 1998;  
362 Fink et al., 2003; Gaudilliere et al., 2004) and with membrane targeting and cytoskeletal functions of  
363 Cobl also being controlled by  $Ca^{2+}$ /CaM (Hou et al., 2015). The additional  $Ca^{2+}$ /CaM regulation of

364 the Cobl-like/syndapin I interface would now provide another key regulatory mechanism right at the  
365 interlinking bridge between Cobl and Cobl-like.

366 The regulatory mechanism is based on an N terminal stretch of amino acids of Cobl-like proteins in  
367 front of the so-called Cobl Homology domain, which is absent in Cobl proteins. With “KRAP1”, Ca<sup>2+</sup>  
368 signaling allowed for the modulation of specifically one out of three syndapin I binding sites of Cobl-  
369 like (**Figure 11**).

370 Cobl-like mutants, which either solely lacked the N terminal CaM binding site or the single  
371 Ca<sup>2+</sup>/CaM-regulated syndapin binding “KRAP1”, both failed to rescue Cobl-like loss-of-function  
372 phenotypes in dendritic branching. The N terminal CaM association regulating the  
373 “KRAP1”/syndapin I interaction and consistently also the “KRAP1” thus were critical for Cobl-like’s  
374 functions in dendritogenesis.

375

376 Our data clearly shows that dendritic arborization of developing neurons requires the Ca<sup>2+</sup>/CaM- and  
377 syndapin I-coordinated, joined action of Cobl and Cobl-like. In other cells and/or cellular processes,  
378 Cobl and Cobl-like also seem to have their independent, individual functions, such as the critical role  
379 of Cobl in F-actin formation right beneath the sensory apparatus of outer hair cells in the inner ear,  
380 the loss of which correlated with defects in pericentriolar material organization, in postnatal planar  
381 cell polarity refinement and in hearing (Haag et al., 2018). Further studies of *Cobl* KO mice unveiled  
382 an importance of Cobl for a specialized set of filaments interconnecting structural elements in the F-  
383 actin-rich terminal web of microvilli-decorated epithelial cells in the small intestine. However, there  
384 were no indications of an additional Cobl-like involvement (Beer et al., 2020). Also in proteomic  
385 analyses of myoblasts, which upon IGFN1 deficiency show altered G-to-F-actin ratios, only Cobl was  
386 identified but not Cobl-like (Cracknell et al., 2020).

387 Likewise, apart from dendritic branching of neurons studied here, there are no hints on any Cobl roles  
388 in functions that the *Cobl-like* gene has been linked to, such as diabetes and obesity (Mancina et al.,  
389 2013; Sharma et al., 2017). Cobl-like was also suggested as biomarker for different cancer types  
390 (Gordon et al., 2003; Gordon et al., 2009; Wang et al., 2013; Han et al., 2017; Plešingerová et al.,  
391 2017; Takayama et al., 2018), to be suppressed by Epstein-Barr virus infection (Gillman et al., 2018)  
392 and to be involved in B-cell development (Plešingerová et al., 2018) but there are no hints on Cobl  
393 roles in any of these processes.

394 The extension of very fine and elaborately branched cellular structures over hundreds of micrometers,  
395 as in dendritogenesis of neurons, certainly represents an extreme and rather special case of cellular  
396 morphogenesis. It is therefore well conceivable that a joined action of both Cobl and Cobl-like is  
397 required to promote actin filament formation at locally restricted sites to drive further branching. It  
398 currently seems plausible that Cobl and Cobl-like's different actin filament formation mechanisms –  
399 spatial rearrangement of three actin monomers by the three WH2 domains of Cobl generating actin  
400 nuclei (Ahuja et al., 2007) *versus* use of the single WH2 domain of Cobl-like and the actin-binding  
401 cofactor Abp1 in a structurally not fully understood trans-mechanism (Izadi et al., 2018) – and their  
402 different modes of regulation by  $Ca^{2+}$  (Hou et al., 2015; Izadi et al., 2018) represent the distinct  
403 functions of Cobl and Cobl-like that have to be combined to power dendritic arborization. The  
404 recently identified Cobl regulation by PRMT2-mediated arginine methylation (Hou et al., 2018) may  
405 potentially also provide a unique aspect that needs to be integrated into the joined, interdependent  
406 function of Cobl and Cobl-like in dendritic branch induction.

407 Although to our knowledge, besides the here reported functions of Cobl, no information on functional  
408 cooperations of any actin nucleators is available for any actin cytoskeletal process in neuronal  
409 function or development, some initial studies on other actin nucleators also hint towards more  
410 interactive roles than initially thought. The actin nucleator Spire works with formin 2 in *Drosophila*

411 oocytes (Quinlan et al., 2007; Pfender et al., 2011; Montaville et al., 2014). The formin mDia1 was  
412 reported to synergize with the APC protein (Okada et al., 2010; Breitsprecher et al., 2012). mDia1  
413 was furthermore very recently found to indirectly interact with the Arp2/3 complex functionally  
414 cooperating in cortical F-actin stiffening of mitotic HeLa cells (Cao et al., 2020). Furthermore, the  
415 actin nucleator JMY was found to interact with the Arp2/3 complex in *in vitro*-reconstitutions  
416 (Zuchero et al., 2009; Firat-Karalar et al., 2011). However, as JMY RNAi did not cause any  
417 statistically significant decline in cell migration (Zuchero et al., 2009; Firat-Karalar et al., 2011) – a  
418 process firmly established to involve the Arp2/3 complex - the functional importance of a putative  
419 cooperation of JMY with the Arp2/3 complex in the formation of actin filaments remains unclear.

420 While these initial observations and the in part apparently conflicting data show that we are only at  
421 the very beginning of identifying and understanding any cooperative functions of actin nucleators, the  
422 here studied cell biological process of dendritic branching highlights that clearly there are actin  
423 filament-driven cellular processes, which require the coordinated action of not only one but at least  
424 two effectors promoting the formation of F-actin. Our mechanistic and functional studies clearly  
425 demonstrate that with Cobl and Cobl-like shaping neurons into their complex morphologies involves  
426 regulated and physically coordinated interactions of different actin filament formation-promoting  
427 factors at the base of nascent dendritic protrusion sites.

428

429

430

## 431 **Material and Methods**

### 432 **DNA constructs**

433 Plasmids encoding for GFP-Cobl-like and parts thereof were described previously (Izadi et al., 2018)  
434 and generated by PCR using the EST clone UniProtID Q3UMF0 as template, respectively. GFP-  
435 Cobl-like<sup>111-262</sup> and Cobl-like<sup>1-111</sup> were generated by subcloning with the help of internal restriction  
436 sites. Additional Cobl-like deletion mutants were generated by combining the following forward  
437 primers, aa1 fw: 5'-AATTAGATCTATGGACCGCAGCGTCCCCGATCC-3'; aa261 fw: 5'-  
438 AAAGATCTGATATCAGCAGAGAG-3'; aa537 fw: 5'-AAAGATCTAAGGATCCTGATTCAGC-  
439 3'; aa740 fw: 5'-GCCTCAAGAGAATTCAGG-3'; aa376 fw: 5'-  
440 TTGAATTCTTAAACCATGATCGCTTC-3'; aa182 fw: 5'- TTAGATCTCCTACACCTATAATC-  
441 3' with the following reverse primers, aa457 rv: 5'- AACTCGAGCCCCGGGACCAAGGGAGC-3';  
442 aa538 rv: 5'-TTCTCGAGTTAATCAGGATCCTTCTC-3'; aa741 rv: 5'-  
443 TCCTGAATTCTCTTGAGG-3'; aa540 rv: 5'-TTCTCGAGTTAATCAGGATCCTTCTC-3'; aa411  
444 rv: 5'-GCAAGCTTGGTTTTTCGAAGGTGG-3'; aa272 rv: 5'-  
445 AAGAATTCTCAGTTGTGTGATATTTG-3'; aa380 rv: 5'-TTGAATTCGAAGCGATCATGGTG-  
446 3'.

447 Cobl-like mutants lacking the N terminal CaM binding site Cobl-like<sup>ΔCaM NT</sup> (Δaa11-45) were  
448 generated by fusing a PCR product (primers, aa1-10+46-51 fw: 5'-  
449 AAAGATCTATGGACCGCAGCGTCCCCGGATCCCCGTACCCAAGAATCACAAATTCCTG-3'  
450 and aa741 rv: 5'-TCCTGAATTCTCTTGAGG-3') with Cobl-like<sup>740-1273</sup> using the internal EcoRI site  
451 (corresponding to aa740/741) to obtain the respective mutated full length protein.

452 Cobl-like mutants lacking only the first “KRAP” motif (Δaa59-69; ΔKRAP1) were generated by  
453 fusing a DNA fragment obtained by PCR using an RNAi-resistant Cobl-like construct (Izadi et al.,  
454 2018) as template and primers aa1 fw (5'-AATTAGATCTATGGACCGCAGCGTCCCCGATCC-3')

455 and aa58 rv (5'-TTAAGCTTGCTCTGACAAATATG-3') with a second PCR product (primer aa70  
456 fw 5'-TTAAGCTTGCCGAGACGAAGGGC-3' and aa741 rev: 5'-TCCTGAATTCTCTTGAGG-3')  
457 using a HindIII site. The resulting Cobl-like<sup>1-741ΔKRAP1</sup> was used to either generate Cobl-like<sup>1-457ΔKRAP1</sup>  
458 using an internal SmaI site corresponding to aa456/457 or fused to Cobl-like<sup>740-1273</sup> to generate the  
459 respective full length Cobl-like mutant Cobl-like<sup>ΔKRAP1</sup>.

460 Cobl-like mutants lacking all three “KRAP” motifs were generated by PCR using primers aa70 fw 5'-  
461 TTAAGCTTGCCGAGACGAAGGGC-3' and aa333 5'-TTAAGCTTTGCATCCGAGGGC-3' rv  
462 and fusing the resulting PCR product with a second PCR product obtained by using primers aa413 fw  
463 5'-TTAAGCTTCTGGCTCAGACTGATG-3' and aa457 rv as well as with a PCR product resulting  
464 from the above described aa1 fw and aa58 rv primers to give rise to aa59-69+334-412 deletion  
465 construct (Cobl-like<sup>1-457ΔKRAP</sup>). Using an internal SmaI restriction site, Cobl-like<sup>1-457ΔKRAP</sup> was then  
466 fused to the more C terminal parts of Cobl-like to give rise to either Cobl-like<sup>1-741ΔKRAP</sup> or Cobl-  
467 like<sup>ΔKRAP</sup> mutants.

468 A Cobl-like deletion mutant lacking the N terminal Cobl Homology domain Cobl-like<sup>Δ1-412</sup> was  
469 generated by fusing a PCR product (primers, aa413 fw: 5'- TTAAGCTTCTGGCTCAGACTGATG-  
470 3' and aa741 rv: 5'-TCCTGAATTCTCTTGAGG-3'; with Cobl-like<sup>740-1273</sup> to obtain Cobl-like<sup>Δ1-412</sup>.

471 Plasmids encoding for GST fusion proteins of Cobl-like<sup>1-411</sup> were generated by subcloning into  
472 pGEX-4T-2 (GE Healthcare). A plasmid encoding for TrxHis-Cobl-like<sup>1-411</sup> was generated by PCR  
473 and subcloning into pET-32 (Novagen) (primers, aa1 fw: 5'-  
474 AATTAGATCTATGGACCGCAGCGTCCCCGATCC-3'; aa411 rv: 5'-  
475 GGGTCGACGGTTTTTCGAAGGTGG-3') using EcoRI and Sall sites.

476 The RNAi construct directed against mouse and rat Cobl-like coexpressing GFP (Cobl-like RNAi#1)  
477 and scrambled RNAi control were described before (Izadi et al., 2018; Pinyol et al., 2007).  
478 Additionally, Cobl-like RNAi and scrambled RNAi were inserted into a pRNAT vector coexpressing

479 farnesylated mCherry (mCherryF) (pRNAT-mCherryF; Schneider et al., 2014). Plasmids for rescue  
480 attempts were built by replacing the GFP reporter by either RNAi-insensitive, GFP-Cobl-like (Cobl-  
481 like RNAi/Cobl-like\* and scrambled RNAi/Cobl-like\*; Izadi et al., 2018), or by mutant GFP-Cobl-  
482 like sequences generated based on Cobl-like\*.

483 Plasmids encoding for GST-tagged SdpI full-length and SH3 domain (aa376-441), respectively, as  
484 well as for a P434L-mutated SH3 (SdpI<sup>SH3mut</sup>) were described previously (Qualmann et al, 1999;  
485 Qualmann and Kelly, 2000). An alternative syndapin I SH3 domain (aa378-441) was as described  
486 (Braun et al., 2005).

487 Plasmids encoding for Xpress-tagged syndapin I full-length, Flag-syndapin I and mitochondrially  
488 targeted syndapin I (Mito-mCherry-SdpI), syndapin I  $\Delta$ SH3 (Mito-mCherry-SdpI <sup>$\Delta$ SH3</sup>) and mCherry  
489 (Mito-mCherry) were described by Qualmann et al. (1999), Qualmann and Kelly (2000), Kessels and  
490 Qualmann (2002), Braun et al. (2005) and Dharmalingam et al. (2009), respectively. Syndapin I-  
491 mRubyRFP was generated by subcloning syndapin I into a derivative of pEGFP-N1 containing  
492 mRubyRFP instead of GFP (Izadi et al., 2018).

493 mCherryF-coexpressing SdpI RNAi (bp297-317; for validations see Dharmalingam et al., 2009)  
494 vector and the corresponding control pRNAT vector were described previously (Schneider et al.,  
495 2014).

496 GST-SdpII<sup>SH3</sup> (SdpII-I, aa383-488) and GST-SdpIII<sup>SH3</sup> (aa366-425) were described before  
497 (Qualmann and Kelly, 2000; Seemann et al., 2017). Flag-syndapin II-s was as described  
498 (Dharmalingam et al., 2009). Flag-syndapin III was generated by subcloning from GST-syndapin III  
499 (Braun et al., 2005) and insertion into pCMV-tag2B.

500 GFP-Cobl, Flag-mCherry-Cobl and GFP-Cobl<sup>1-713</sup> were described previously (Hou et al., 2015).  
501 Mito-GFP-Cobl<sup>1-713</sup> was generated by subcloning the respective Cobl-encoding sequence into the  
502 mitochondrial targeting vector.

503 RNAi constructs against rat and mouse Cobl coexpressing farnesylated mCherry were generated by  
504 subcloning into pRNAT-mCherryF (Schneider et al., 2014). The control expressing scrambled RNAi  
505 and mCherryF were as described (Schneider et al., 2014).

506 Correct cloning by PCR was verified by sequencing in all cases.

507

## 508 **Antibodies, reagents and proteins**

509 Rabbit anti-Cobl-like antibodies were raised against a combination of two GST-Cobl-like fusion  
510 proteins (GST-Cobl-like<sup>537-741</sup> and GST-Cobl-like<sup>740-1015</sup>) as described previously (Izadi et al., 2018).

511 The antibodies were affinity-purified according to procedures described previously (Qualmann et al.,  
512 1999; Kessels et al., 2000). Anti-syndapin I and anti-syndapin III antibodies were described  
513 previously (Qualmann et al., 1999; Koch et al., 2011). Anti-GST and anti-TrxHis antibodies from  
514 guinea pig and rabbit were described before, too (Qualmann and Kelly, 2000; Braun et al., 2005;  
515 Schwintzer et al., 2011).

516 Polyclonal rabbit anti-GFP (ab290) was from Abcam. Monoclonal mouse anti-GFP antibodies (JL-8)  
517 were from Clontech (632381). Monoclonal mouse anti-Flag (M2) and anti-MAP2 (HM-2) antibodies  
518 as well as polyclonal rabbit anti-Flag antibodies (F3165, F7425) were from Sigma. Anti-Xpress  
519 antibodies were from Invitrogen (46-0528).

520 Secondary antibodies used included, Alexa Fluor488- and 568-labeled goat anti-guinea pig antibodies  
521 (A-11073, A-11075), Alexa Fluor488- and 568-labeled donkey anti-mouse antibodies (R37114,  
522 A10037), Alexa Fluor647- and 680-labeled goat anti-mouse antibodies (A-21236, A32723), Alexa  
523 Fluor488-labeled donkey anti-rabbit (A-21206), Alexa Fluor568- 647- and 680-labeled goat anti-  
524 rabbit antibodies (A-11036, A-21245, A-21109) (ThermoFisher Scientific) as well as DyLight800-  
525 conjugated goat anti-rabbit and anti-mouse antibodies (ThermoFisher Scientific, 35571, 35521).  
526 Donkey anti-guinea pig antibodies coupled to IRDye680 and IRDye800, respectively, were from LI-



527 COR Bioscience (925-32411 and 926-32411). Goat anti-rabbit, anti-guinea pig and anti-mouse-  
528 peroxidase antibodies were from Dianova (Jackson ImmunoResearch) (711-035-152, 106-036-003,  
529 115-036-003). 10 nm gold-conjugated goat anti-guinea pig antibodies (EM.GAR10) for electron  
530 microscopical examinations of freeze-fractured samples were from BBI Solutions. MitoTracker Deep  
531 Red 633 was from Molecular Probes.

532 Sepharose 4B-coupled CaM was from GE Healthcare. GST- and TrxHis-tagged fusion proteins were  
533 purified from *E. coli* lysates using glutathione-agarose or -sepharose (Sigma; GenScript) and Talon  
534 metal affinity resin (Clontech), respectively, as described previously (Schwintzer et al., 2011;  
535 Qualmann & Kelly, 2000). After purification, fusion proteins were dialyzed against PBS,  
536 characterized by SDS-PAGE and snap-frozen and stored at -80°C.

537 Tag-free syndapin I and III were generated by expressing both proteins in the pGEX-6P vector (GE  
538 Healthcare) and cutting of the GST tag from purified proteins using PreScission protease (GE  
539 Healthcare) in 150 mM NaCl, 2 mM DTT and 20 mM HEPES pH 7.4 buffer overnight at 4°C (during  
540 dialysis after elution). Cleaved off GST and uncleaved GST fusion proteins were removed with  
541 glutathione-sepharose.

542

#### 543 ***In vitro*-reconstitutions of direct protein-protein interactions**

544 Direct protein/protein interactions were demonstrated by coprecipitation assays with combinations of  
545 recombinant TrxHis- and GST-tagged fusion proteins purified from *E. coli* and/or immobilized CaM  
546 (GE Healthcare), respectively, in 10 mM HEPES pH 7.4, 300 mM NaCl, 0.1 mM MgCl<sub>2</sub>, 1% (v/v)  
547 Triton X-100 supplemented with EDTA-free protease inhibitor cocktail as well as in some cases with  
548 500 μM Ca<sup>2+</sup> added.

549 Eluted proteins were analyzed by SDS-PAGE, transferred to PVDF membranes by either semi-dry or  
550 tank blotting and then subjected to immunodetection with anti-TrxHis and anti-GST antibodies.

551 Primary antibodies were detected with fluorescent secondary antibodies using a Licor Odyssey  
552 System.

553

### 554 **Culture and transfection, and immunostaining of cells**

555 Culturing of HEK293 and COS-7 cells and their transfection using TurboFect (ThermoFisher  
556 Scientific) as well as their immunolabeling was essentially done as described (Kessels et al., 2001;  
557 Haag et al., 2012).

558 In reconstitutions and visualizations of protein complex formations at the surfaces of mitochondria in  
559 intact cells, mitochondria of COS-7 cells were stained with 0.2  $\mu$ M MitoTracker Deep Red 633 in  
560 medium at 37°C for 30 min and cells were subsequently fixed with 4% (w/v) paraformaldehyde  
561 (PFA) for 7 min.

562

### 563 **Preparation of HEK293 cell lysates**

564 HEK293 cells were washed with PBS 24-48 h after transfection, harvested and subjected to  
565 sonification for 10 seconds and/or lysed by incubation in lysis buffer (10 mM HEPES pH 7.4, 0.1  
566 mM  $MgCl_2$ , 1 mM EGTA, 1% (v/v) Triton X-100) containing 150 mM NaCl and EDTA-free  
567 protease inhibitor Complete (Roche) for 20 to 30 min at 4°C (Kessels & Qualmann, 2006). Cell  
568 lysates were obtained as supernatants from centrifugations at 20000xg (20 min at 4°C).

569

### 570 **Coprecipitation of proteins from HEK293 cell lysates**

571 Coprecipitation experiments with extracts from HEK293 cells expressing different GFP-fusion  
572 proteins were essentially performed as described before (Qualmann et al., 1999; Schwintzer et al.,  
573 2011). In brief, HEK293 cell lysates were incubated with purified, recombinant GST-fusion proteins  
574 immobilized on glutathione-sepharose beads (GenScript) for 3 h at 4°C. The reactions were then

575 washed several times with lysis buffer containing 150 mM NaCl and EDTA-free protease inhibitor  
576 Complete. Bound protein complexes were subsequently eluted with 20 mM reduced glutathione, 120  
577 mM NaCl, 50 mM Tris/HCl pH 8.0 (30 min RT) or obtained by boiling the beads in 4xSDS sample  
578 buffer.

579 For coprecipitations with CaM, HEK293 cell lysates were prepared in an EGTA-free lysis buffer  
580 containing 150 mM NaCl, EDTA-free protease inhibitor cocktail and 200  $\mu$ M calpain I inhibitor. Cell  
581 lysates were supplemented with either 1 mM EGTA or 500  $\mu$ M  $\text{Ca}^{2+}$  to obtain conditions without and  
582 with  $\text{Ca}^{2+}$ , respectively. After incubation with 25  $\mu$ l CaM-sepharose 4B (GE Healthcare) for 3 h at  
583 4°C and washing, bound proteins were isolated by boiling in 4xSDS sample buffer. Lysates,  
584 supernatants and eluates were analyzed by immunoblotting.

585 Triple coprecipitations, i.e. the examinations of GST-Cobl-like<sup>1-411</sup>/syndapin/GFP-Cobl<sup>1-713</sup>  
586 complexes with either syndapin I or syndapin III as bridging component were essentially performed  
587 as described above (lysis buffer containing 150 mM NaCl) except that the extracts from HEK293  
588 cells expressing GFP-Cobl<sup>1-713</sup> were not only incubated with immobilized GST-Cobl-like<sup>1-411</sup> but also  
589 with tag-free syndapin I or syndapin III for 3 h. Bound proteins were eluted with 20 mM reduced  
590 glutathione, 120 mM NaCl, 50 mM Tris/HCl pH 8.0. Eluates and supernatants were separated by  
591 SDS-PAGE and analyzed by anti-syndapin I/III, anti-GST and anti-GFP immunoblotting.

592

### 593 **Coprecipitation of endogenous syndapin I from mouse brain lysates**

594 For coprecipitation of endogenous syndapin I, brain lysates were prepared from mice sacrificed by  
595 cervical dislocation. Extracts were prepared using an Ultra Turrax homogenizer (Ika Ultra Turrax  
596 T5Fu; 20000 rpm, 10 s) in lysis buffer containing EDTA-free protease inhibitor Complete and  
597 supplemented with 100 mM NaCl and 200  $\mu$ M calpain inhibitor I. After clearing the lysates from cell  
598 debris by centrifugation at 1000xg for 20 min, the supernatants were used to precipitate endogenous

599 syndapin I by TrxHis-Cobl-like<sup>1-411</sup> fusion proteins immobilized on Talon metal affinity resin. Bound  
600 proteins were eluted by boiling in sample buffer, separated by SDS-PAGE and analyzed by anti-  
601 syndapin I immunoblotting.

602

### 603 **Heterologous and quantitative coimmunoprecipitation analyses**

604 Heterologous coimmunoprecipitations addressing Cobl-like/syndapin I, syndapin II and syndapin III  
605 interactions were done with lysates of HEK293 cells transfected with GFP-Cobl-like fusion proteins  
606 and GFP, respectively, in combination with Flag-tagged syndapins. The cell lysates were incubated  
607 with anti-Flag antibodies or non-immune IgGs in lysis buffer containing 100 mM NaCl and EDTA-  
608 free protease inhibitor Complete for 3 h at 4°C. Antibody-associated protein complexes were isolated  
609 by 2 h incubation with protein A-agarose (Santa Cruz Biotechnology) at 4°C. The  
610 immunoprecipitates were washed with lysis buffer containing 100 mM NaCl, eluted from the matrix  
611 by boiling in a mix of 2 M (final) urea and SDS-sample buffer and analyzed by immunoblotting.

612 Comparisons of GFP-Cobl-like<sup>1-457</sup> and Cobl-like<sup>1-457ΔKRAP1</sup> for their ability to associate with Flag-  
613 syndapin I were also done by anti-GFP immunoprecipitations from lysates of transfected HEK293  
614 cells generated according to the procedure described above.

615 For quantitative evaluations of the regulation of Cobl-like/syndapin I complexes, anti-GFP  
616 immunoprecipitations of GFP-Cobl-like fusion proteins were done in the presence (2 μM CaCl<sub>2</sub>  
617 added) and in the absence of Ca<sup>2+</sup> (1 mM EGTA added), respectively.

618 The amounts of coimmunoprecipitated Flag-syndapin I were quantified based on the detection of  
619 fluorescent antibody signals using a Licor Odyssey System providing a linear, quantitative read-out  
620 over several orders of magnitude. Anti-syndapin I coimmunoprecipitation signals were normalized to  
621 the amounts of anti-GFP signal representing the immunoprecipitated material. This ensured that  
622 similar amounts of GFP-Cobl-like proteins were examined for their extent of Flag-syndapin I

623 coimmunoprecipitation. Both fluorescence signals were detected on the same blot using the two  
624 different fluorescence channels of the Licor Odyssey System. Data were expressed as percent  
625 difference from  $\text{Ca}^{2+}$ -free conditions.

626

### 627 **Endogenous coimmunoprecipitations from mouse brain extracts**

628 Mice were sacrificed and the brain was cut into small pieces and homogenized in 10 mM HEPES pH  
629 7.5, 30 mM NaCl, 0.1 mM  $\text{MgCl}_2$  and 1 mM EGTA with protease inhibitors. Afterwards, Triton X-  
630 100 was added (0.2% v/v final) and the homogenates were extracted for 1 h at 4-6°C. The samples  
631 were then centrifuged at 100000xg for 30 min at 4°C and the resulting supernatants (mouse brain  
632 extracts) were incubated with affinity-purified rabbit anti-Cobl-like antibodies and non-immune  
633 rabbit IgGs, respectively, bound to protein A agarose (preincubation at 4°C and washing with above  
634 buffer and 0.2% (v/v) Triton X-100 (CoIP buffer)). After 4 h of incubation at 6°C, the proteins bound  
635 to the protein A agarose were washed with ice-cold CoIP buffer, eluted with SDS sample buffer  
636 (100°C, 5 min) and analyzed by immunoblotting using anti-Cobl-like and anti-syndapin I antibodies.

637

### 638 **Microscopy**

639 Images were recorded as z-stacks using a Zeiss AxioObserver.Z1 microscope (Zeiss) equipped with  
640 an ApoTome, Plan-Apochromat 100x/1.4, 63x/1.4, 40x/1.3 and 20x/0.5 objectives and an AxioCam  
641 MRm CCD camera (Zeiss).

642 Digital images were recorded by ZEN2012. Image processing was done by Adobe Photoshop.

643

### 644 **Spinning disk live microscopy of developing neurons**

645 Primary rat hippocampal neurons were transiently transfected using Lipofectamine 2000 at DIV6. For  
646 imaging, the culture medium was replaced by 20 mM HEPES pH 7.4, 140 mM NaCl, 0.8 mM  $\text{MgCl}_2$ ,

647 1.8 mM CaCl<sub>2</sub>, 5 mM KCl, 5 mM D-glucose (live imaging buffer) adjusted to isoosmolarity using a  
648 freezing point osmometer (Osmomat 3000; Gonotec).

649 Live imaging was conducted at 37°C 16-24 h after transfection employing an open coverslip holder,  
650 which was placed into a temperature- and CO<sub>2</sub>-controlled incubator built around a spinning disk  
651 microscope based on a motorized Axio Observer (Zeiss). The microscope was equipped with a  
652 spinning disk unit CSU-X1A 5000, 488 nm/100 mW OPSL laser and 561 nm/40 mW diode lasers as  
653 well as with a QuantEM 512SC EMCCD camera (Zeiss).

654 Images were taken as stacks of 7-17 images at Z-intervals of 0.31 µm depending on cellular  
655 morphology using a C-Apochromat objective (63x/1.20W Korr M27; Zeiss). The time intervals were  
656 set to 10 s. Exposure times of 50-200 ms and 3-12% laser power were used.

657 Image processing was done using ZEN2012 and Adobe Photoshop software.

658

### 659 **Culturing, transfection and immunostaining of primary rat hippocampal neurons**

660 Primary rat hippocampal neuronal cultures were prepared, maintained and transfected as described  
661 previously (Qualmann et al., 2004; Pinyol et al., 2007; Schwintzer et al., 2011). In brief, neurons  
662 prepared from hippocampi of E18 rats were seeded at densities of about 60000/well (24-well plate)  
663 and 200000/well (12-well plate), respectively. Cells were cultured in Neurobasal<sup>TM</sup> medium  
664 containing 2 mM L-glutamine, 1x B27 and 1 µM/ml penicillin/streptomycin. The neurons were  
665 maintained at 37°C with 90% humidity and 5% CO<sub>2</sub>.

666 Transfections were done in antibiotic-free medium using 2 µl Lipofectamine2000 and 1 µg DNA per  
667 well in 24 well plates. After 4 h, the transfection medium was replaced by conditioned medium and  
668 neurons were cultured further. All analyses were done with several independent neuronal  
669 preparations.

670 Fixation was done in 4% (w/v) PFA in PBS pH 7.4 at RT for 5 min. Permeabilization and blocking  
671 were done with 10% (v/v) horse serum, 5% (w/v) BSA in PBS with 0.2% (v/v) Triton X-100  
672 (blocking solution). Antibody incubations were done in the same buffer without Triton X-100  
673 according to Kessels et al. (2001) and Pinyol et al. (2007). In brief, neurons were incubated with  
674 primary antibodies for 1 h at RT and washed three times with blocking solution. Afterwards, they  
675 were incubated with secondary antibodies (1 h, RT). Finally, the coverslips were washed with  
676 blocking solution, PBS and water and mounted onto coverslips using Moviol.

677

### 678 **Quantitative analyses of dendrites of primary hippocampal neurons**

679 For loss-of-function analyses and the corresponding rescue experiments, as well as for suppressions  
680 of Cobl-like overexpression phenotypes, DIV4 hippocampal neurons were transfected with RNAi and  
681 control vectors, respectively, and fixed and immunostained about 34 h later (DIV5.5). 2-6  
682 independent coverslips per condition per assay and neurons of at least 2 independent neuronal  
683 preparations were analyzed based on the anti-MAP2 immunostaining of transfected neurons.

684 Transfected neurons were sampled systematically on each coverslip. Morphometric measurements  
685 were based on anti-MAP2 immunolabeling of transfected neurons. Using Imaris 7.6 software, the  
686 number of dendritic branching points, dendritic terminal points, and dendritic filament length were  
687 determined and Sholl analyses (Sholl, 1953) were conducted.

688 For each neuron, a “filament” (morphological trace) was drawn by Imaris 7.6 software using the  
689 following settings: Largest diameter, cell body diameter; thinnest diameter, 0.2  $\mu\text{m}$ ; start seed point,  
690 1.5 x of cell body diameter; disconnected points, 2  $\mu\text{m}$ ; minimum segment size, 10  $\mu\text{m}$ .  
691 Immunopositive areas that were erroneously spliced by Imaris or protrusions belonging to different  
692 cells, as well as filament branch points that the software erroneously placed inside of the cell body  
693 were manually removed from the filament. Parameters determined were saved as Excel files and

694 subjected to statistical significance calculations using GraphPad Prism5 and Prism6 software  
695 (RRID:SCR\_002798).

696

### 697 **Freeze-fracturing and immunogold labeling**

698 Hippocampal neurons were grown for 7 days on poly-D-lysine-coated sapphire disks (diameter 4  
699 mm; Rudolf Brügger, Swiss Micro Technology) in 24 well plates, washed with PBS and subjected to  
700 ultrarapid freezing (4000 K/s) as well as to freeze-fracturing as described for mature neurons  
701 (Schneider et al, 2014).

702 Freeze-fracturing of developing neurons led to low yields of rather fragile replica of inner and outer  
703 membrane leaflets, which, however, were preserved during subsequent washing, blocking and  
704 incubation (Wolf et al., 2019). Replica were incubated with guinea pig anti-syndapin I antibodies  
705 (1:50; overnight, 4°C) and 10 nm gold-conjugated secondary antibodies as described for mature  
706 neurons (Schneider et al., 2014).

707 Controls addressing the specificity of anti-syndapin I labeling of freeze-fracture replica included  
708 evaluations of labeling at the E-face (almost no labeling) and quantitative analyses of syndapin I  
709 labeling densities at control surfaces not representing cellular membranes (low, unspecific  
710 immunogold labeling at a density of only  $0.4/\mu\text{m}^2$ ). Further controls including secondary antibody  
711 controls and labeling of syndapin I KO material were described previously (Schneider et al., 2014).

712 Replica were collected and analyzed using transmission electron microscopy (TEM) and systematic  
713 grid explorations as described (Schneider et al, 2014; Seemann et al., 2017). Images were recorded  
714 digitally and processed by using Adobe Photoshop software. All analyses were done with two  
715 independent neuronal preparations.

716 Membrane areas with parallel membrane orientations (cylindrical) were distinguished from protrusive  
717 topologies, as established previously (Wolf et al., 2019). Anti-syndapin I immunogold labeling



718 densities were determined using the complete area of the respective membrane topology on each  
719 image (measured by using ImageJ).

720 Anti-syndapin I cluster analyses were conducted using circular ROIs of 70 nm diameter. Density of  
721 clusters at cylindrical and protrusive membranes were calculated considering  $\geq 3$  anti-syndapin I  
722 labels per ROI as one cluster. Additionally, anti-syndapin I labeling being single, paired and clustered  
723 in 3 to 8 labels, respectively, was analyzed as percent of total anti-syndapin labeling.

724

### 725 **Statistical analyses and sample-size estimation**

726 No explicit power analyses were used to compute and predefine required sample sizes. Instead, all  
727 neuronal analyses were conducted by systematic sampling of transfected cells across coverslips to  
728 avoid any bias. Morphometric analyses were then conducted by using IMARIS software.

729 All data were obtained from 2-5 independent neuronal preparations seeded onto several independent  
730 coverslips for each condition for transfection and immunostaining. For each condition, n numbers of  
731 individual neurons ranging from about 30 to 40 were aimed for to fully cover the biological variances  
732 of the cells. Higher n numbers yielded from the systematic sampling were accepted, too (e.g. see the  
733 control in **Figure 1E-G** (n=45) and in **Figure 2L-N** (65)). Lower n numbers were only accepted for  
734 the established Cobl overexpression phenotype (n=24) and the Cobl-like-mediated suppression if it  
735 (also n=24), as results were clear and sacrificing further rats for further primary neuron preparations  
736 could thus be avoided (**Figure 2L-N**).

737 Outliers or strongly scattering data reflect biological variance and were thus not excluded from the  
738 analyses.

739 All n numbers are reported directly in the figures of the manuscript and all are numbers of  
740 independent biological samples (i.e. neurons) or biochemical assays, as additional replicates to

741 minimize measurement errors were not required because the technical errors were small in relation to  
742 the biological/biochemical variances.

743 All quantitative biochemical data (**Figure 8E**, **Figure 10E** and **Figure 10G**) are provided as bar and  
744 dot plot overlays to report the individual raw data and the deviations of individual data points around  
745 the mean.

746 Quantitative data represent mean $\pm$ SEM throughout the manuscript. Exceptions are **Figure 10G**, in  
747 which data represents mean $\pm$ absolute error (n=2; no difference), and **Figure 7C**, as the percent of  
748 total labeling shown in **Figure 7C** per definition has no error.

749 Normal data distribution and statistical significance were tested using GraphPad Prism 5 and Prism 6  
750 software (SCR\_002798). The statistical tests employed are reported in the respective figure legends.

751 Dendritic arbor parameters (number of dendritic branch points, number of terminal points and total  
752 dendritic length) were analyzed for statistical significance employing 1-way ANOVA and Tukey  
753 post-test throughout.

754 All Sholl analyses were tested by 2-way ANOVA and Bonferroni post-test.

755 Quantitative evaluation of syndapin I coimmunoprecipitations with Cobl-like<sup>1-741</sup>, Cobl-like<sup>1-457</sup> and  
756 Cobl-like<sup>1-457 $\Delta$ KRAP1</sup> were analyzed by unpaired student's t-test.

757 Anti-syndapin I immunogold labeling densities at different surfaces of freeze-fractured replica of  
758 membranes of developing neurons were analyzed by 1-way ANOVA and the densities of anti-  
759 syndapin I clusters were analyzed by two-tailed Student's t-test.

760 Statistical significances were marked by \*  $p < 0.05$ , \*\*  $p < 0.01$ , \*\*\*  $p < 0.001$  and \*\*\*\*  $p < 0.0001$   
761 throughout. In addition, the numbers of  $p$  values are reported directly in the figures. Note that for  $p$   
762  $< 0.0001$  (\*\*\*\*) no values were provided by the software Prism 6, as the  $p$  values are too small.

763

764

765 **Acknowledgments**

766 We thank A. Kreuzsch, B. Schade and K. Gluth for excellent technical support.

767 This work was supported by *DFG* grants KE685/4-2 to MMK as well as QU116/6-2 and QU116/9-1  
768 to BQ.

769

770

771

772

773 **Author contributions**

774 M. Izadi, E. Seemann, Dirk Schlobinski and Lukas Schwintzer generated data. M. Izadi, E. Seemann,  
775 B. Qualmann and M. Kessels evaluated data. M. Izadi, B. Qualmann and M. Kessels designed the  
776 project and wrote the manuscript.

777

778

779 **Conflict of interests**

780 The authors declare no competing financial interests.

781

782

783 **References**

- 784 Ahuja R, Pinyol R, Reichenbach N, Custer L, Klingensmith J, Kessels MM, and Qualmann B (2007)  
785 Cordon-bleu is an actin nucleation factor and controls neuronal morphology. *Cell* 131:337–350
- 786 Anggono V, and Robinson PJ (2007) Syndapin I and endophilin I bind overlapping proline-rich  
787 regions of dynamin I: role in synaptic vesicle endocytosis. *J Neurochem* 102:931-943
- 788 Beer AJ, Gonzalez Delgado J, Steiniger F, Qualmann B, and Kessels MM (2020) The actin nucleator  
789 Cobl organises the terminal web of enterocytes. *Sci Rep* 10:11156
- 790 Braun A, Pinyol R, Dahlhaus R, Koch D, Fonarev P, Grant BD, Kessels MM, and Qualmann B  
791 (2005) EHD proteins associate with syndapin I and II and such interactions play a crucial role in  
792 endosomal recycling. *Mol Biol Cell* 16:3642-3658
- 793 Breitsprecher D, Jaiswal R, Bombardier JP, Gould CJ, Gelles J, and Goode BL (2012) Rocket  
794 launcher mechanism of collaborative actin assembly defined by single-molecule imaging. *Science*  
795 336:1164-1168
- 796 Cao L, Yonis A, Vaghela M, Barriga EH, Chug P, Smith MB, Maufront J, Lavoie G, Méant A,  
797 Ferber E, Bovellan M, Alberts A, Bertin A, Mayor R, Paluch EK, Roux PP, Jégou A, Romet-  
798 Lemonne G, and Charras G (2020) SPIN90 associates with mDia1 and the Arp2/3 complex to  
799 regulate cortical actin organization. *Nat Cell Biol* 22:803-814
- 800 Carman PJ, and Dominguez R (2018) BAR domain proteins—a linkage between cellular membranes,  
801 signaling pathways, and the actin cytoskeleton. *Biophys Rev* 10:1587-1604
- 802 Chesarone MA and Goode BL (2009) Actin nucleation and elongation factors: mechanisms and  
803 interplay. *Curr Opin Cell Biol* 21:28-37

- 804 Cracknell T, Mannsverk S, Nichols A, Dowle A, and Blanco G (2020) Proteomic resolution of  
805 IGFN1 complexes reveals a functional interaction with the actin nucleating protein COBL. *Exp Cell*  
806 *Res* 395:112179
- 807 Daumke O, Roux A, and Haucke V (2014) BAR domain scaffolds in dynamin-mediated membrane  
808 fission. *Cell* 156:882-892
- 809 Del Pino I, Koch D, Schemm R, Qualmann B, Betz H, and Paarmann I (2014) Proteomic analysis of  
810 glycine receptor  $\beta$  subunit (GlyR $\beta$ )-interacting proteins: evidence for syndapin I regulating synaptic  
811 glycine receptors. *J Biol Chem* 289:11396-11409
- 812 Dharmalingam E, Haeckel A, Pinyol R, Schwintzer L, Koch D, Kessels MM, and Qualmann B  
813 (2009) F-BAR proteins of the syndapin family shape the plasma membrane and are crucial for  
814 neuromorphogenesis. *J Neurosci* 29: 13315-13327
- 815 Fink CC, Bayer KU, Myers JW, Ferrell Jr JE, Schulman H, and Meyer T (2003) Selective regulation  
816 of neurite extension and synapse formation by the  $\beta$  but not the  $\alpha$  isoform of CaMKII. *Neuron*  
817 39:283–297
- 818 Firat-Karalar EN, Hsiue PP, Welch MD (2011) The actin nucleation factor JMY is a negative  
819 regulator of neuritogenesis. *Mol Biol Cell* 22:4563-74
- 820 Gaudillière B, Konishi Y, de la Iglesia N, Yao GL, and Bonni A (2004) A CaMKII-NeuroD signaling  
821 pathway specifies dendritic morphogenesis. *Neuron* 41:229-241
- 822 Gillman ACT, Parker G, Allday MJ, and Bazot Q (2018) Epstein-Barr virus nuclear antigen 3C  
823 inhibits expression of COBLL1 and the ADAM28-ADAMDEC1 locus via interaction with the  
824 histone lysine demethylase KDM2B. *J Virol* 92:e01362-18

- 825 Gordon GJ, Jensen RV, Hsiao LL, Gullans SR, Blumenstock JE, Richards WG, Jaklitsch MT,  
826 Sugarbaker DJ, and Bueno R (2003) Using gene expression ratios to predict outcome among patients  
827 with mesothelioma. *J Natl Cancer Inst* 95:598-605
- 828 Gordon GJ, Dong L, Yeap BY, Richards WG, Glickman JN, Edenfield H, Mani M, Colquitt R,  
829 Maulik G, Van Oss B, Sugarbaker DJ, and Bueno R (2009) Four-gene expression ratio test for  
830 survival in patients undergoing surgery for mesothelioma. *J Natl Cancer Inst* 101:678-686
- 831 Haag N, Schwintzer L, Ahuja R, Koch N, Grimm J, Heuer H, Kessels MM, and Qualmann B (2012)  
832 The actin nucleator Cobl is crucial for Purkinje cell development and works in close conjunction with  
833 the F-actin binding protein Abp1. *J Neurosci* 32: 17842–17856
- 834 Haag N, Schüler S, Nietzsche S, Hübner CA, Strenzke N, Qualmann B, and Kessels MM (2018) The  
835 actin nucleator Cobl is critical for centriolar positioning, postnatal planar cell polarity refinement, and  
836 function of the cochlea. *Cell Rep* 24:2418-2431e6
- 837 Han SH, Kim SH, Kim HJ, Lee Y, Choi SY, Park G, Kim DH, Lee A, Kim J, Choi JM, Kim Y,  
838 Myung K, Kim H, and Kim DW (2017) Cobll1 is linked to drug resistance and blastic transformation  
839 in chronic myeloid leukemia. *Leukemia* 31:1532-1539
- 840 Holderith N, Lorincz A, Katona G, Rózsa B, Kulik A, Watanabe M, and Nusser Z (2012) Release  
841 probability of hippocampal glutamatergic terminals scales with the size of the active zone. *Nat*  
842 *Neurosci* 15:988-997
- 843 Hou W, Izadi M, Nemitz S, Haag N, Kessels MM, and Qualmann B (2015) The actin nucleator Cobl  
844 is controlled by calcium and calmodulin. *PLoS Biol* 13:e1002233

- 845 Itoh T, Erdmann KS, Roux A, Habermann B, Werner H, and De Camilli P (2005) Dynamin and the  
846 actin cytoskeleton cooperatively regulate plasma membrane invagination by BAR and F-BAR  
847 proteins. *Dev Cell* 9:791-804
- 848 Izadi M, Schlobinski D, Lahr M, Schwintzer L, Qualmann B, and Kessels MM (2018) Cobl-like  
849 promotes actin filament formation and dendritic branching using only a single WH2 domain. *J Cell*  
850 *Biol* 217:211-230
- 851 Kessels MM, and Qualmann B (2004) The syndapin protein family: linking membrane trafficking  
852 with the cytoskeleton. *J Cell Sci* 117:3077-3086
- 853 Kessels MM, and Qualmann B (2006) Syndapin oligomers interconnect the machineries for  
854 endocytic vesicle formation and actin polymerization. *J Biol Chem* 281:13285-13299
- 855 Kessels MM, and Qualmann B (2015) Different functional modes of BAR domain proteins in  
856 formation and plasticity of mammalian postsynapses. *J Cell Sci* 128:3177-3185
- 857 Kessels MM, and Qualmann B (2020) Syndapins integrate N-WASP in receptor-mediated  
858 endocytosis. *EMBO J* 21:6083-6094
- 859 Kessels MM, Engqvist-Goldstein AEY, and Drubin DG (2000) Association of mouse actin-binding  
860 protein 1 (mAbp1/SH3P7), an Src kinase target, with dynamic regions of the cortical actin  
861 cytoskeleton in response to Rac1 activation. *Mol Biol Cell* 11:393-412
- 862 Kessels MM, Engqvist-Goldstein AEY, Drubin DG, and Qualmann B (2001) Mammalian Abp1, a  
863 signal-responsive F-actin-binding protein, links the actin cytoskeleton to endocytosis via the GTPase  
864 dynamin. *J Cell Biol* 153:351-366

- 865 Kessels MM, Schwintzer L, Schlobinski D, Qualmann B (2011) Controlling actin cytoskeletal  
866 organization and dynamics during neuronal morphogenesis. *Eur J Cell Biol* 90:926-33
- 867 Koch D, Spiwoks-Becker I, Sabanov V, Sinning A, Dugladze T, and Stellmacher A (2011) Proper  
868 synaptic vesicle formation and neuronal network activity critically rely on syndapin I. *EMBO J* 30:  
869 4955-4969
- 870 Mancina RM, Burza MA, Maglio C, Pirazzi C, Sentinelli F, and Incani M (2013) The COBLL1 C  
871 allele is associated with lower serum insulin levels and lower insulin resistance in overweight and  
872 obese children. *Diabetes Metab Res Rev* 29:413-416
- 873 Montaville P, Jegou A, Pernier J, Comppeer C, Guichard B, Mogessie B, Schuh M, Romet-Lemonne  
874 G, and Carlier MF (2014) Spire and Formin 2 synergize and antagonize in regulating actin assembly  
875 in meiosis by a ping-pong mechanism. *PLoS Biol* 12:e1001795
- 876 Nakamura Y, Harada H, Kamasawa N, Matsui K, Rothman JS, Shigemoto R, Silver RA, DiGregorio  
877 DA, and Takahashi T (2015) Nanoscale distribution of presynaptic Ca<sup>2+</sup> channels and its impact on  
878 vesicular release during development. *Neuron* 85:145-158
- 879 Okada K, Bartolini F, Deaconescu AM, Moseley JB, Dogic Z, Grigorieff N, Gundersen GG, and  
880 Goode BL (2010) Adenomatous polyposis coli protein nucleates actin assembly and synergizes with  
881 the formin mDia1. *J Cell Biol* 189:1087-1096
- 882 Peter BJ, Kent HM, Mills IG, Vallis Y, Butler PJ, Evans PR, and McMahon HT (2004) BAR  
883 domains as sensors of membrane curvature: the amphiphysin BAR structure. *Science* 303:495-499
- 884 Pfender S, Kuznetsov V, Pleiser S, Kerkhoff E, and Schuh M (2011) Spire-type actin nucleators  
885 cooperate with formin-2 to drive asymmetric oocyte division. *Curr Biol* 21:955-960



- 886 Pinyol R, Haeckel A, Ritter A, Qualmann B, and Kessels MM (2007) Regulation of N-WASP and the  
887 Arp2/3 complex by Abp1 controls neuronal morphology. *PLoS One* 2:e400
- 888 Plesingerova H, Janovska P, Mishra A, Smyckova L, Poppova L, Libra A, Plevova K, Ovesna P,  
889 Radova L, Doubek M, Pavlova S, Pospíšilova S, and Bryja V (2018) Expression of COBLL1  
890 encoding novel ROR1 binding partner is robust predictor of survival in chronic lymphocytic  
891 leukemia. *Haematologica* 103:313-324
- 892 Quinlan ME, Hilgert S, Bedrossian A, Mullins RD, and Kerkhoff E (2007) Regulatory interactions  
893 between two actin nucleators, Spire and Cappuccino. *J Cell Biol* 179:117-128
- 894 Qualmann B and Kessels MM (2009) New players in actin polymerization--WH2-domain-containing  
895 actin nucleators. *Trends Cell Biol* 19:276-85
- 896 Qualmann B, and Kelly RB (2000) Syndapin isoforms participate in receptor-mediated endocytosis  
897 and actin organization. *J Cell Biol* 148:1047-1062
- 898 Qualmann B, Roos J, DiGregorio PJ, and Kelly RB (1999) Syndapin I, a synaptic dynamin-binding  
899 protein that associates with the neural Wiskott-Aldrich syndrome protein. *Mol Biol Cell* 10:501-513
- 900 Qualmann B, Boeckers TM, Jeromin M, Gundelfinger ED, and Kessels MM (2004) Linkage of the  
901 actin cytoskeleton to the postsynaptic density via direct interactions of Abp1 with the ProSAP/Shank  
902 family. *J Neurosci* 24:2481-2495
- 903 Qualmann B, Koch D, and Kessels MM (2011) Let's go bananas: revisiting the endocytic BAR code.  
904 *EMBO J* 30:3501-3515
- 905 Rajan I, and Cline HT (1998) Glutamate receptor activity is required for normal development of  
906 tectal cell dendrites in vivo. *J Neurosci* 18:7836-7846

- 907 Seemann E, Sun M, Krueger S, Tröger J, Hou W, Haag N, Schüler S, Westermann M, Huebner CA,  
908 Romeike B, Kessels MM, and Qualmann B (2017) Deciphering caveolar functions by syndapin III  
909 KO-mediated impairment of caveolar invagination. *Elife* 6:e29854
- 910 Schneider K, Seemann E, Liebmann L, Ahuja R, Koch D, Westermann M, Hübner CA, Kessels MM,  
911 and Qualmann B (2014) ProSAP1 and membrane nanodomain-associated syndapin I promote  
912 postsynapse formation and function. *J Cell Biol* 205:197-215
- 913 Schwintzer L, Koch N, Ahuja R, Grimm J, Kessels MM, and Qualmann B (2011) The functions of  
914 the actin nucleator Cobl in cellular morphogenesis critically depend on syndapin I. *EMBO J* 30:3147-  
915 3159
- 916 Sharma V, Sharma I, Sethi I, Mahajan A, Singh G, Angural A, Bhanwer AJS, Dhar MK, Singh V,  
917 Rai E, and Sharma S (2017) Replication of newly identified type 2 diabetes susceptible loci in  
918 Northwest Indian population. *Diabetes Res Clin Pract* 126:160-163
- 919 Shimada A, Niwa H, Tsujita K, Suetsugu S, Nitta K, and Hanawa-Suetsugu K (2007) Curved EFC/F-  
920 BAR-domain dimers are joined end to end into a filament for membrane invagination in endocytosis.  
921 *Cell* 129:761-772
- 922 Sholl DA (1953) Dendritic organization in the neurons of the visual and motor cortices of the cat. *J*  
923 *Anat* 87:387-406
- 924 Takayama KI, Suzuki T, Fujimura T, Takahashi S, and Inoue S (2018) COBLL1 modulates cell  
925 morphology and facilitates androgen receptor genomic binding in advanced prostate cancer. *Proc*  
926 *Natl Acad Sci USA* 115:4975-4980

927 Tanaka J, Matsuzaki M, Tarusawa E, Momiyama A, Molnar E, Kasai H, and Shigemoto R (2005)  
928 Number and density of AMPA receptors in single synapses in immature cerebellum. *J Neurosci*  
929 25:799-807

930 Wang Q, Navarro MVAS, Peng G, Molinelli E, Goh SL, Judson BL, Rajashankar KR, and  
931 Sondermann H (2009) Molecular mechanism of membrane constriction and tubulation mediated by  
932 the F-BAR protein Pacsin/Syndapin. *Proc Natl Acad Sci USA* 106:12700-12705

933 Wang Z, Yan Z, Zhang B, Rao Z, Zhang Y, Liu J, Yu L, Zhao Y, Yang B, Wu T, and Gao J (2013)  
934 Identification of a 5-gene signature for clinical and prognostic prediction in gastric cancer patients  
935 upon microarray data. *Med Oncol* 30:678-688

936 Wolf D, Hofbrucker-MacKenzie SA, Izadi M, Seemann E, Steiniger F, Schwintzer L, Koch D,  
937 Kessels MM, and Qualmann B (2019) Ankyrin repeat-containing N-Ank proteins shape cellular  
938 membranes. *Nat Cell Biol* 21:1191-1205

939 Zuchero JB, Coutts AS, Quinlan ME, La Thangue NB, and Mullins RD (2009) p53-cofactor JMY is a  
940 multifunctional actin nucleation factor. *Nat Cell Biol* 11:451-459

941

942

943

944

945

946

947

948

949

950 **Figures legends**

951

952 **Figure 1 - Cobl-like and the actin nucleator Cobl work at the same dendritic branching sites**  
953 **and largely phenocopy each other in their critical role in dendritic arborization.**

954 (A-C) Maximum intensity projections (MIPs) of anti-MAP2 immunostained developing primary  
955 hippocampal neurons transfected as indicated at DIV4 and fixed at DIV5.5. Asterisks, transfected  
956 neurons. Bars, 20  $\mu\text{m}$ . (D-G) Quantitative comparative Cobl-like and Cobl loss-of-function analyses  
957 of indicated dendritic parameters. (H, I) MIPs of GFP-Cobl-like and Flag-mCherry-Cobl in dendrites  
958 of developing hippocampal neurons (DIV6) in standard colors (H) and as heat map representation (I),  
959 respectively. Arrows, examples of putative, nascent dendritic branch induction sites with  
960 accumulations of both Cobl and Cobl-like. Bar, 5  $\mu\text{m}$ . Data, mean $\pm$ SEM. 1-way ANOVA+Tukey (D-  
961 F) and 2-way ANOVA+Bonferroni (G).

962

963

964 **Figure 2 - Functional interdependence of Cobl-like and Cobl in dendritic arbor formation.**

965 (A-D) MIPs of neurons showing the suppression of the Cobl-like gain-of-function phenotype (B;  
966 GFP-Cobl-like+Scr. RNAi) by mCherryF-reported RNAi plasmids directed against Cobl (C) in  
967 comparison to control neurons (A; GFP+Scr. RNAi) and Cobl RNAi neurons (D; GFP+Cobl RNAi).  
968 (E-G) Quantitative determinations of indicated dendritic arborization parameters unveiling a full  
969 suppression of all Cobl-like functions in dendritic arbor formation by a lack of Cobl. (H-N) Related  
970 images (H-K) and quantitative data (L-N) of experiments revealing a functional dependence of Cobl  
971 on Cobl-like. Asterisks, transfected neurons. Bars, 10  $\mu\text{m}$ . Data, mean $\pm$ SEM. 1-way ANOVA+Tukey  
972 (E-G and L-N).

973

974

975 **Figure 3 - Cobl-like associates with syndapins.**

976 (A) Coprecipitation analyses of GFP-tagged Cobl-like and deletion mutants thereof with immobilized  
977 syndapin I SH3 domain (GST-SdpI<sup>SH3</sup>). (B) Related coprecipitation studies with the SH3 domains of  
978 syndapin I, syndapin II (SdpII<sup>SH3</sup>) and syndapin III (SdpIII<sup>SH3</sup>), respectively. (C) Reconstitution of  
979 the association of TrxHis-Cobl-like<sup>1-411</sup> with purified GST-syndapin I and GST-syndapin I SH3  
980 domain but not with GST. (D) Scheme of Cobl-like with its domains (PRD, proline-rich domain; RD,  
981 Abp1-binding repeat domain; WH2, WH2 domain) and deletion mutants used (red, not binding  
982 syndapins; green, binding). Red in the Cobl Homology domain, “KRAP” motifs (not drawn to scale).  
983 (E) Coprecipitation assays with Cobl-like deletion mutants mapping Cobl-like’s syndapin binding  
984 sites. (F) Coimmunoprecipitations unveiling a specific association of GFP-Cobl-like<sup>1-741</sup> with Flag-  
985 syndapin I. (G-I) Reconstitution and visualization of Cobl-like/syndapin I complexes in COS-7 cells  
986 using mitochondrially targeted syndapin I (G,H) as well as a mutant lacking the SH3 domain (Mito-  
987 mCherry-SdpI<sup>ΔSH3</sup>) (I) with GFP-Cobl-like (G) and GFP-Cobl-like<sup>1-741</sup> (H,I). Bars, 10 μm. (J)  
988 Coprecipitation of endogenous syndapin I from mouse brain lysates by TrxHis-Cobl-like<sup>1-411</sup>. (K)  
989 Endogenous coimmunoprecipitation of Cobl-like and syndapin I from mouse brain lysates.

990

991

992 **Figure 4 - Cobl-like functions in dendritic arbor formation rely on syndapin I.**

993 (A-C) MIPs of DIV5.5 neurons transfected as indicated. Asterisks, transfected neurons. Bars, 20 μm.  
994 (D-G) Quantitative determinations of key dendritic arborization aspects promoted by Cobl-like for  
995 their dependence on syndapin I. Data, mean±SEM. 1-way ANOVA+Tukey (D-F) and 2-way  
996 ANOVA+Bonferroni (G).

997

998 **Figure 5 - Cobl-like is physically linked to Cobl via syndapin I acting as a bridging component.**

999 **(A,B)** Coprecipitation analyses unveiling specific and syndapin-dependent formation of complexes  
1000 composed of immobilized GST-Cobl-like, syndapin I **(A)** and syndapin III **(B)**, respectively, as well  
1001 as GFP-Cobl<sup>1-713</sup>. White lines indicate omitted blot lanes. **(C-E)** Reconstitution and visualization of  
1002 Cobl-like/syndapin I/Cobl protein complexes in COS-7 cells. Mito-GFP-Cobl<sup>1-713</sup> **(C,D)** but not  
1003 Mito-GFP **(E)** recruited mCherry-Cobl-like<sup>1-741</sup> in the presence of Xpress-syndapin I **(C)** but not in its  
1004 absence **(D)**. Boxes in **C-E**, areas presented as magnified insets **(C,D)**, 4fold; **E**, 3fold). Arrows,  
1005 examples of colocalization of all three channels. Bars, 10  $\mu$ m.

1006

1007

1008 **Figure 6 - Cobl-like and syndapin I coincide at nascent dendritic branch sites.**

1009 **(A)** MIPs of individual frames of a 3D-time-lapse recording of a dendrite segment of a DIV7 rat  
1010 hippocampal neuron coexpressing GFP-Cobl-like and syndapin I (SdpI)-mRubyRFP. Arrows, GFP-  
1011 Cobl-like and syndapin I enrichments prior to protrusion initiation from these dendritic sites; \*, tips  
1012 of growing dendritic protrusions; (\*), abandoned protrusions. **(B)** Heat map representations. Bars, 2.5  
1013  $\mu$ m.

1014

1015

1016 **Figure 7 - Syndapin I nanoclusters are enriched at sites of dendritic protrusion.**

1017 **(A,A',A'')** TEM images of anti-syndapin I immunogold-labeled freeze-fracture replica of developing  
1018 neurons (DIV7). Red lines highlight membrane topologies protruding from regular cylindrical  
1019 topology. Arrowheads, abundant and clustered anti-syndapin I immunogold labeling (10 nm) at  
1020 protrusive sites. Arrows, sparse and rarely clustered anti-syndapin immunogold labeling at regular,  
1021 cylindrical membrane structures. Bars, 200 nm. **(B)** Quantitative evaluations of anti-syndapin I

1022 labeling densities at protrusive and cylindrical membrane topologies. (C) Quantitative analysis of the  
1023 relative abundance of differently clustered syndapin I labels (ROIs, 35 nm radius). In total, 335  
1024 (protrusive) and 130 (cylindrical) labels were evaluated. (D) Quantitative analysis of the density of  
1025 anti-syndapin I nanoclusters ( $\geq 3$  anti-syndapin I immunogold labels/ROI) at regular cylindrical  
1026 membrane surfaces and at those with protrusive topology. Data **B,D**, mean $\pm$ SEM. 1-way ANOVA  
1027 (**B**); two-tailed Student's t-test (**D**).

1028

1029

1030 **Figure 8 - Ca<sup>2+</sup>/CaM associates with the N terminus of Cobl-like and positively regulates Cobl-**  
1031 **like's syndapin I association.**

1032 (A) Scheme of Cobl-like and deletion mutants used for CaM binding studies (B) (red, no Ca<sup>2+</sup>-  
1033 dependent binding; green, Ca<sup>2+</sup>-dependent binding). (B) Coprecipitations with immobilized CaM in  
1034 presence (500  $\mu$ M) and absence of Ca<sup>2+</sup> and different Cobl-like deletion mutants. Green arrowheads,  
1035 increased CaM interactions in the presence of Ca<sup>2+</sup>. White lines, lanes omitted from blots. (C)  
1036 Coprecipitation analyses with immobilized CaM and purified TrxHis-Cobl-like<sup>1-411</sup> and GST-  
1037 syndapin I (GST-SdpI) showing direct and simultaneous interactions of Cobl-like<sup>1-411</sup> with both CaM  
1038 and syndapin I. (D,E) Quantitative coimmunoprecipitation analyses demonstrating that Ca<sup>2+</sup>/CaM  
1039 signaling leads to increased syndapin I coimmunoprecipitation with Cobl-like<sup>1-741</sup>. Blue arrowhead,  
1040 position of the only faintly detected GFP-Cobl-like<sup>1-741</sup> in the lysates (D). Green arrowhead, increase  
1041 of coimmunoprecipitated syndapin I (D). (E) Anti-syndapin I signal per immunoprecipitated Cobl-  
1042 like (expressed as change from conditions without Ca<sup>2+</sup>). Data, bar/dot plot overlays with  
1043 mean $\pm$ SEM. Unpaired student's t-test.

1044

1045

1046 **Figure 9 - The N terminal CaM binding site of Cobl-like is indispensable for all critical**  
1047 **functions of Cobl-like in dendritic arbor formation.**

1048 (A) Coprecipitation analyses of Cobl-like<sup>1-741</sup>, Cobl-like<sup>1-741ΔCaM NT</sup> (Δ11-45) and GFP with  
1049 immobilized CaM in Ca<sup>2+</sup> presence and absence. Arrowhead, increased CaM interaction of Cobl-  
1050 like<sup>1-741</sup> upon Ca<sup>2+</sup> (disrupted in Cobl-like<sup>1-741ΔCaM NT</sup>). (B-C) Functional analyses in primary  
1051 hippocampal neurons unveiling that an RNAi-insensitive (\*) Cobl-like mutant lacking the N terminal  
1052 CaM binding site (GFP-Cobl-like<sup>\*ΔCaM NT</sup>) failed to rescue the Cobl-like loss-of-function phenotypes.  
1053 Red asterisks, transfected neurons (transfection, DIV4; analyses, DIV5.5). Bars, 10 μm. (D-G)  
1054 Quantitative evaluations of indicated dendritic parameters. Data, mean±SEM. 1-way ANOVA+Tukey  
1055 (D-F); 2-way ANOVA+Bonferroni (G).

1056

1057

1058 **Figure 10 - Ca<sup>2+</sup>/CaM signaling exclusively promotes the syndapin I association with the first of**  
1059 **the three “KRAP” motifs and this single Ca<sup>2+</sup>/CaM-regulated motif is crucial for Cobl-like’s**  
1060 **functions.**

1061 (A) Coprecipitations with immobilized syndapin I SH3 domain (SdpI<sup>SH3</sup>) and Cobl-like and ΔKRAP  
1062 mutants thereof. (B) MIP of a MitoTracker-stained COS-7 cell transfected with Mito-mCherry-  
1063 syndapin I and GFP-Cobl-like<sup>ΔKRAP</sup> (colocalization of only red and blue channels, purple in merge).  
1064 Bar, 10 μm. (C-G) Quantitative coimmunoprecipitation analyses with GFP-Cobl-like<sup>1-457</sup> (C) in  
1065 comparison to a corresponding mutant solely lacking the first “KRAP” motif (GFP-Cobl-like<sup>1-</sup>  
1066 <sup>457ΔKRAP1</sup>) in the presence and absence of Ca<sup>2+</sup>, respectively (D). Arrowhead, increase of  
1067 coimmunoprecipitated Flag-syndapin I with GFP-Cobl-like<sup>1-457</sup> upon Ca<sup>2+</sup>. (E) Quantitation anti-  
1068 syndapin I coimmunoprecipitation upon Ca<sup>2+</sup> presence normalized to immunoprecipitated GFP-Cobl-  
1069 like<sup>1-457</sup> and GFP-Cobl-like<sup>1-457ΔKRAP1</sup>, respectively (as deviation from conditions without Ca<sup>2+</sup>). (F,G)



1070 Side-by-side comparison of syndapin I coimmunoprecipitations with GFP-Cobl-like<sup>1-457</sup> and GFP-  
1071 Cobl-like<sup>1-457ΔKRAP1</sup> (F) and quantitative analysis thereof (G). Data, mean±absolute error. White line,  
1072 lanes omitted from blot. (H-J) Functional analyses of the importance of Cobl-like's CaM-regulated  
1073 syndapin I binding site (KRAP1) by loss-of-function rescue experiments evaluating the indicated  
1074 dendritic arbor parameters of developing neurons (transfection, DIV4; analysis, DIV5.5). Note that  
1075 neither a Cobl-like mutant lacking the entire N terminal part (GFP-Cobl-like<sup>Δ1-412</sup>) nor GFP-Cobl-  
1076 like<sup>ΔKRAP1</sup> was able to rescue Cobl-like's loss-of-function phenotypes. Data, E, bar/dot plot overlays  
1077 with mean±SEM. Unpaired student's t-test (E); mean±absolute error (G); mean±SEM; 1-way  
1078 ANOVA+Tukey (H-J).

1079

1080

1081 **Figure 11 - Model depicting how Cobl and Cobl-like functions in dendritic branch initiation are**  
1082 **joined, coordinated and controlled.**

1083 Cobl and Cobl-like functions are not only both critical for dendritic branch formation but both factors  
1084 promoting the formation of actin filaments were found to act in an interdependent manner. The  
1085 underlying mechanisms of coordination and control are depicted and include physical linkage of Cobl  
1086 and Cobl-like by syndapin I forming dimers and multimeric clusters at the convexly bent membrane  
1087 areas at the base of nascent branch sites. The newly identified interaction of syndapin I with Cobl-like  
1088 is mediated by three independent KRAP motifs (red), the most N-terminal of which (marked by white  
1089 asterisk) is regulated by a newly discovered CaM association to Cobl-like's N terminus. All  
1090 mechanistic aspects unveiled in this study are depicted in detail and the corresponding functional  
1091 evaluations conducted are listed in brief. The WH2 domains of Cobl and Cobl-like are shown to  
1092 indicate the C terminal domains of both proteins and their cytoskeletal functions.

1093

1094

1095

1096 **Legends of Figure Supplements**

1097 **Figure 1—figure supplement 1 - Comparison of domain structures and alignment of Cobl-like**  
1098 **with the actin nucleator Cobl.**

1099 (A) Scheme of Cobl-like with its domains in comparison to the actin nucleator Cobl with its domains.

1100 Abbreviations: PRD, proline-rich domain (PRD next to the Cobl Homology domain is an Abp1- and

1101 PRMT2-binding site and therefore colored in light green reminiscent of the RD, i.e. the Abp1-binding

1102 repeat domain in Cobl-like); WH2, WH2 domain. (B) Amino acid sequence alignment of murine

1103 Cobl-like (gi:74201419) and Cobl (gi:162135965) using Clustal Omega

1104 (<https://www.ebi.ac.uk/Tools/msa/clustalo/>). Marked are the Cobl Homology domains of both

1105 proteins (boxed in light blue) and the “KRAP” motifs (boxed in red) of both proteins. Furthermore,

1106 the single C terminal WH2 domain of Cobl-like and the three WH2 domains of Cobl are marked by

1107 orange letters. The CaM binding region of Cobl in the Cobl Homology domain and in the C terminal

1108 CaM binding regions in Cobl and Cobl-like are boxed in yellow, the Abp1- and PRMT2-binding

1109 PRD of Cobl is boxed in light green. The Abp1-binding repeat domain of Cobl-like is boxed in green

1110 and the proline-rich region located N terminal of the Abp1-binding area is boxed in purple. Note that

1111 although Cobl-like is considered as evolutionary ancestor of Cobl, the sequence conservation

1112 between both proteins in general is very low (\*, identity; “:”, high similarity; “.”, moderate

1113 similarity). Even in the most-conserved part, the so-called Cobl Homology domain, the similarity is

1114 limited to the central core of this proposed domain and to the “KRAP” motifs.

1115

1116

1117

1118 **Figure 3—figure supplement 1 - Cobl-like associates with syndapins.**

1119 (A) Immunoblot analyses of a reconstitution of the association of TrxHis-Cobl-like<sup>1-411</sup> with  
1120 recombinant, purified GST-syndapin I and GST-syndapin I SH3 domain but not with a mutated  
1121 syndapin I SH3 domain (P434L; SdpI<sup>SH3mut</sup>). (B) Anti-GFP immunoblotting of the GST controls of  
1122 the syndapin I coprecipitation assays with Cobl-like deletion mutants shown in **Figure 3E**. (C,D)  
1123 Immunoblotting analyses of specific coimmunoprecipitations of GFP-Cobl-like<sup>1-741</sup> but not GFP with  
1124 Flag-tagged syndapin II-s (short splice variant, SdpII-s) and syndapin III (SdpIII). (E,F) MIPs  
1125 showing control experiments accompanying the protein complex reconstitutions between GFP-Cobl-  
1126 like and GFP-Cobl-like<sup>1-741</sup> and mitochondrially targeted syndapin I (Mito-mCherry-SdpI) shown in  
1127 **Figure 3G-I**. (E) GFP is not recruited to Mito-mCherry-SdpI-enriched sites. (F) GFP-Cobl-like is not  
1128 recruited to mitochondria when a Mito-mCherry-SdpI lacking the SH3 domain (Mito-mCherry-  
1129 SdpI<sup>ASH3</sup>) is coexpressed. Bars, 10  $\mu$ m.

1130

1131

1132 **Figure 5—figure supplement 1 - Recruitment of syndapin I to mitochondrial surfaces in intact**  
1133 **cells by Mito-GFP-Cobl<sup>1-713</sup>.**

1134 Reconstitution and visualization of Cobl/syndapin I protein complexes inside of intact COS-7 cells.  
1135 Mitochondrially targeted Cobl<sup>1-713</sup> (green in merge) recruits Xpress-tagged syndapin I (red in merge;  
1136 anti-Xpress immunolabeling) to mitochondria (blue in merge; visualized by MitoTracker). Boxes  
1137 mark the area presented as magnified inset (4fold enlargement). Colocalization of all three channels  
1138 appears in whitish colors (white, beige, turquoise, rosé) in the merge. Bar, 10  $\mu$ m.

1139

1140

1141 **Figure 10–figure supplement 1 - The three “KRAP” motifs are critical for Cobl-like’s**  
1142 **association with syndapin I.**

1143 (A) Anti-GFP immunoblotting of control experiments of the coprecipitation analyses shown in  
1144 **Figure 10A** demonstrating that neither Cobl-like nor any of the Cobl-like mutants associated with  
1145 GST. (B,C) MIPs of COS-7 cells transfected with Mito-mCherry-syndapin I and GFP-Cobl-like<sup>1-741</sup>  
1146 (B) and a GFP-Cobl-like mutant lacking the regions with the three “KRAP” motifs (GFP-Cobl-like<sup>1-</sup>  
1147 <sup>741ΔKRAP</sup>) (C), respectively. Note the successful recruitment of GFP-Cobl-like<sup>1-741</sup> to syndapin I-  
1148 decorated mitochondria (colocalization of all three channels shown appears white in merge; examples  
1149 are marked by arrowheads; B), whereas the corresponding GFP-Cobl-like<sup>1-741ΔKRAP</sup> was not recruited  
1150 to mitochondria (colocalization of only Mito-mCherry-syndapin I (red in merge) and MitoTracker  
1151 (blue in merge) appears purple in merge; C). Bars, 10 μm.

## Figure 1

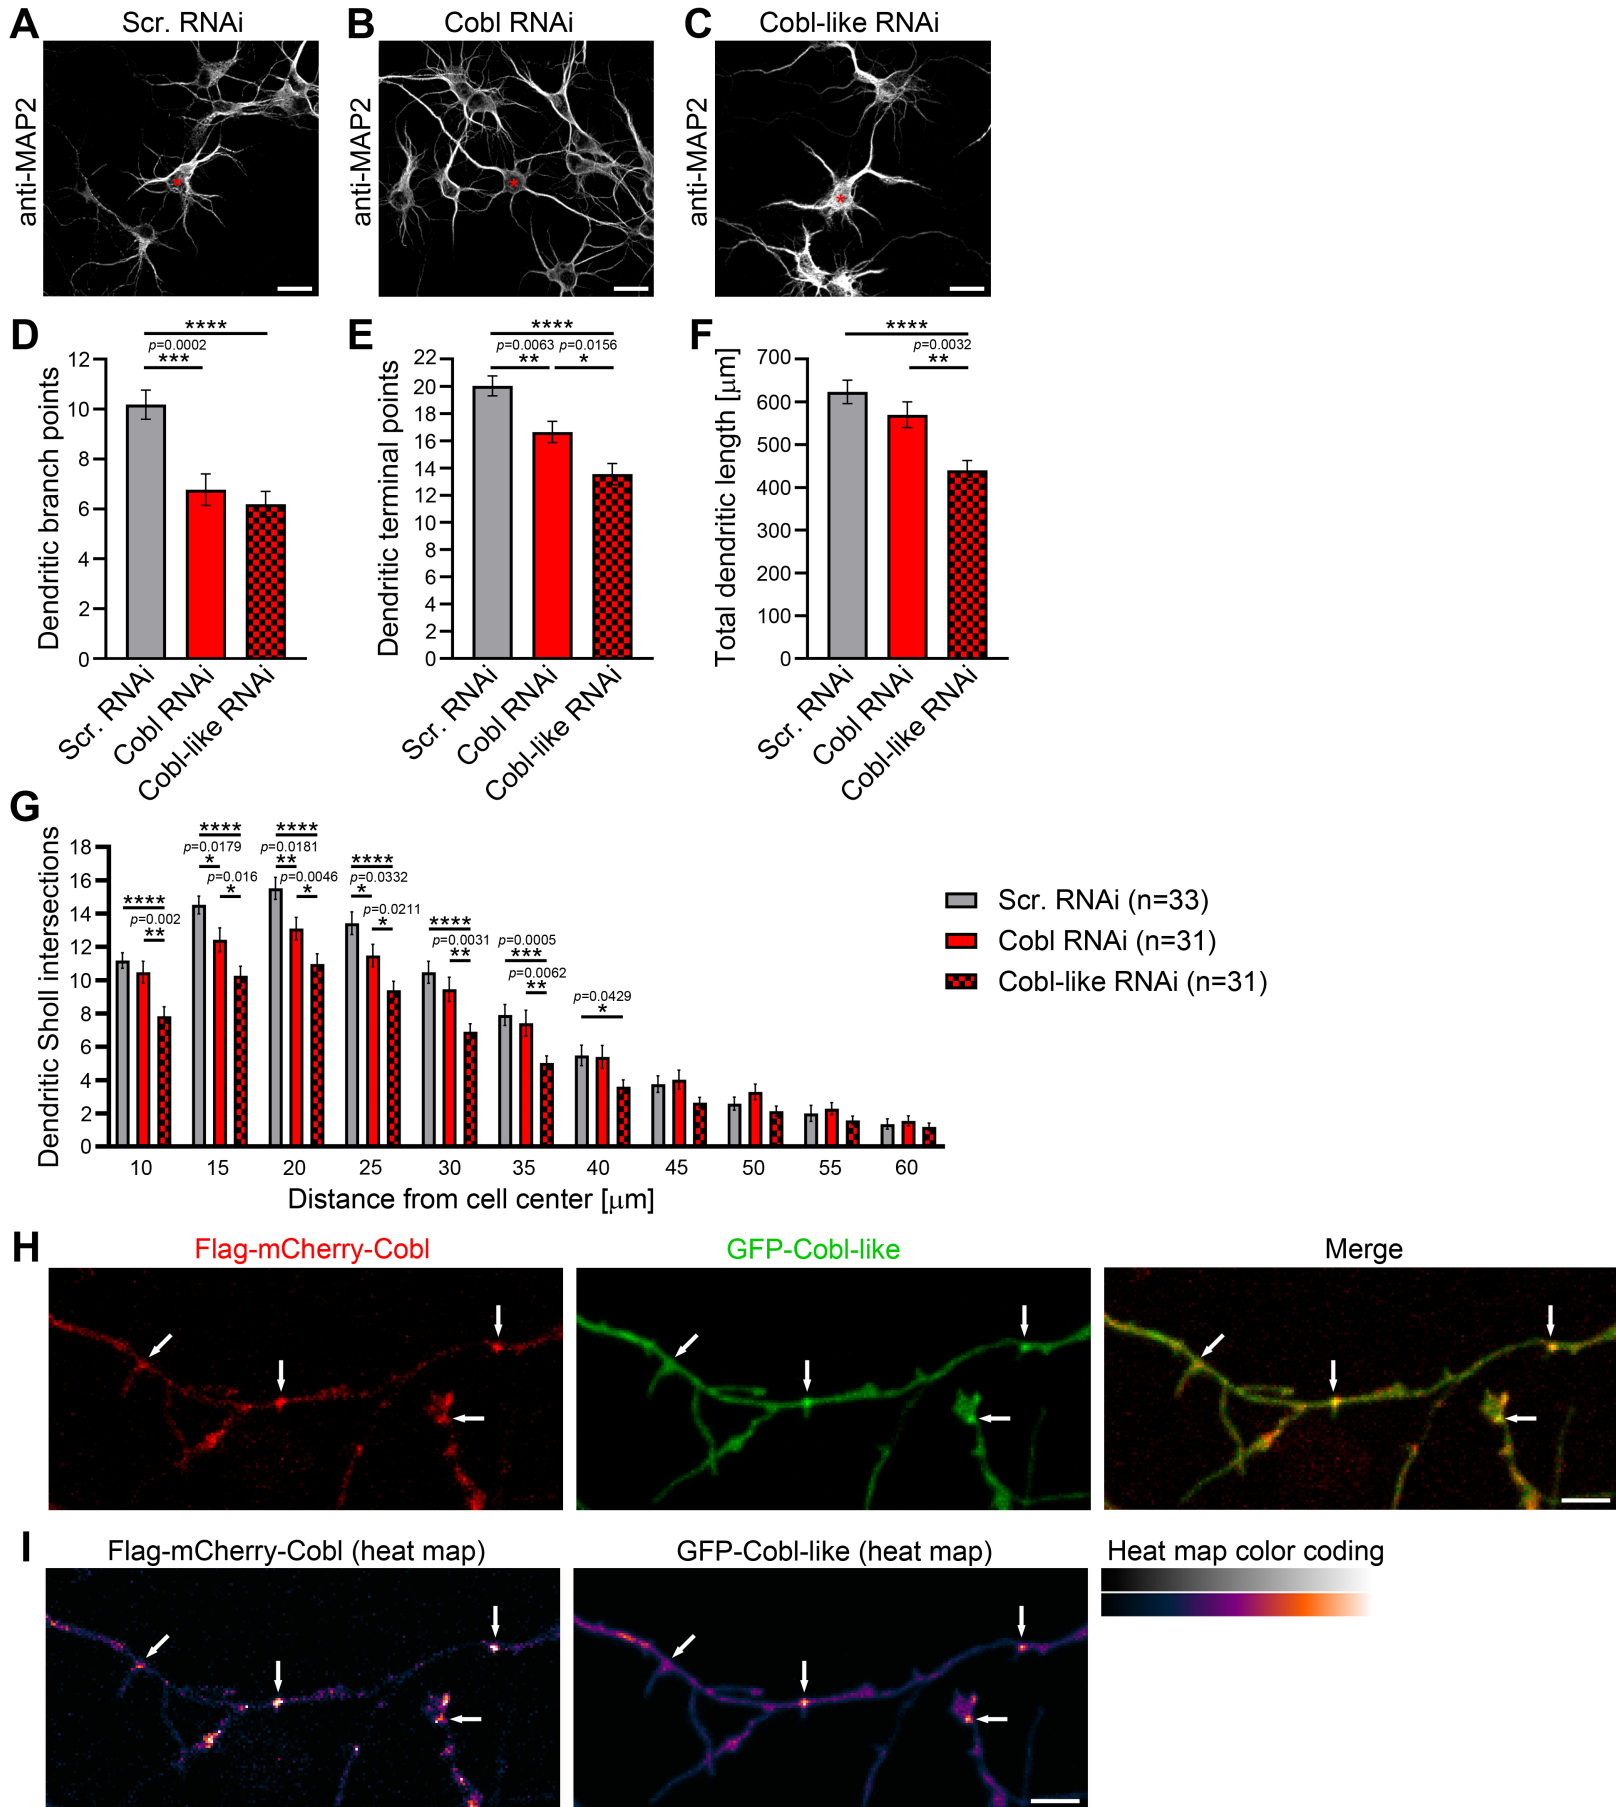



## Figure 2

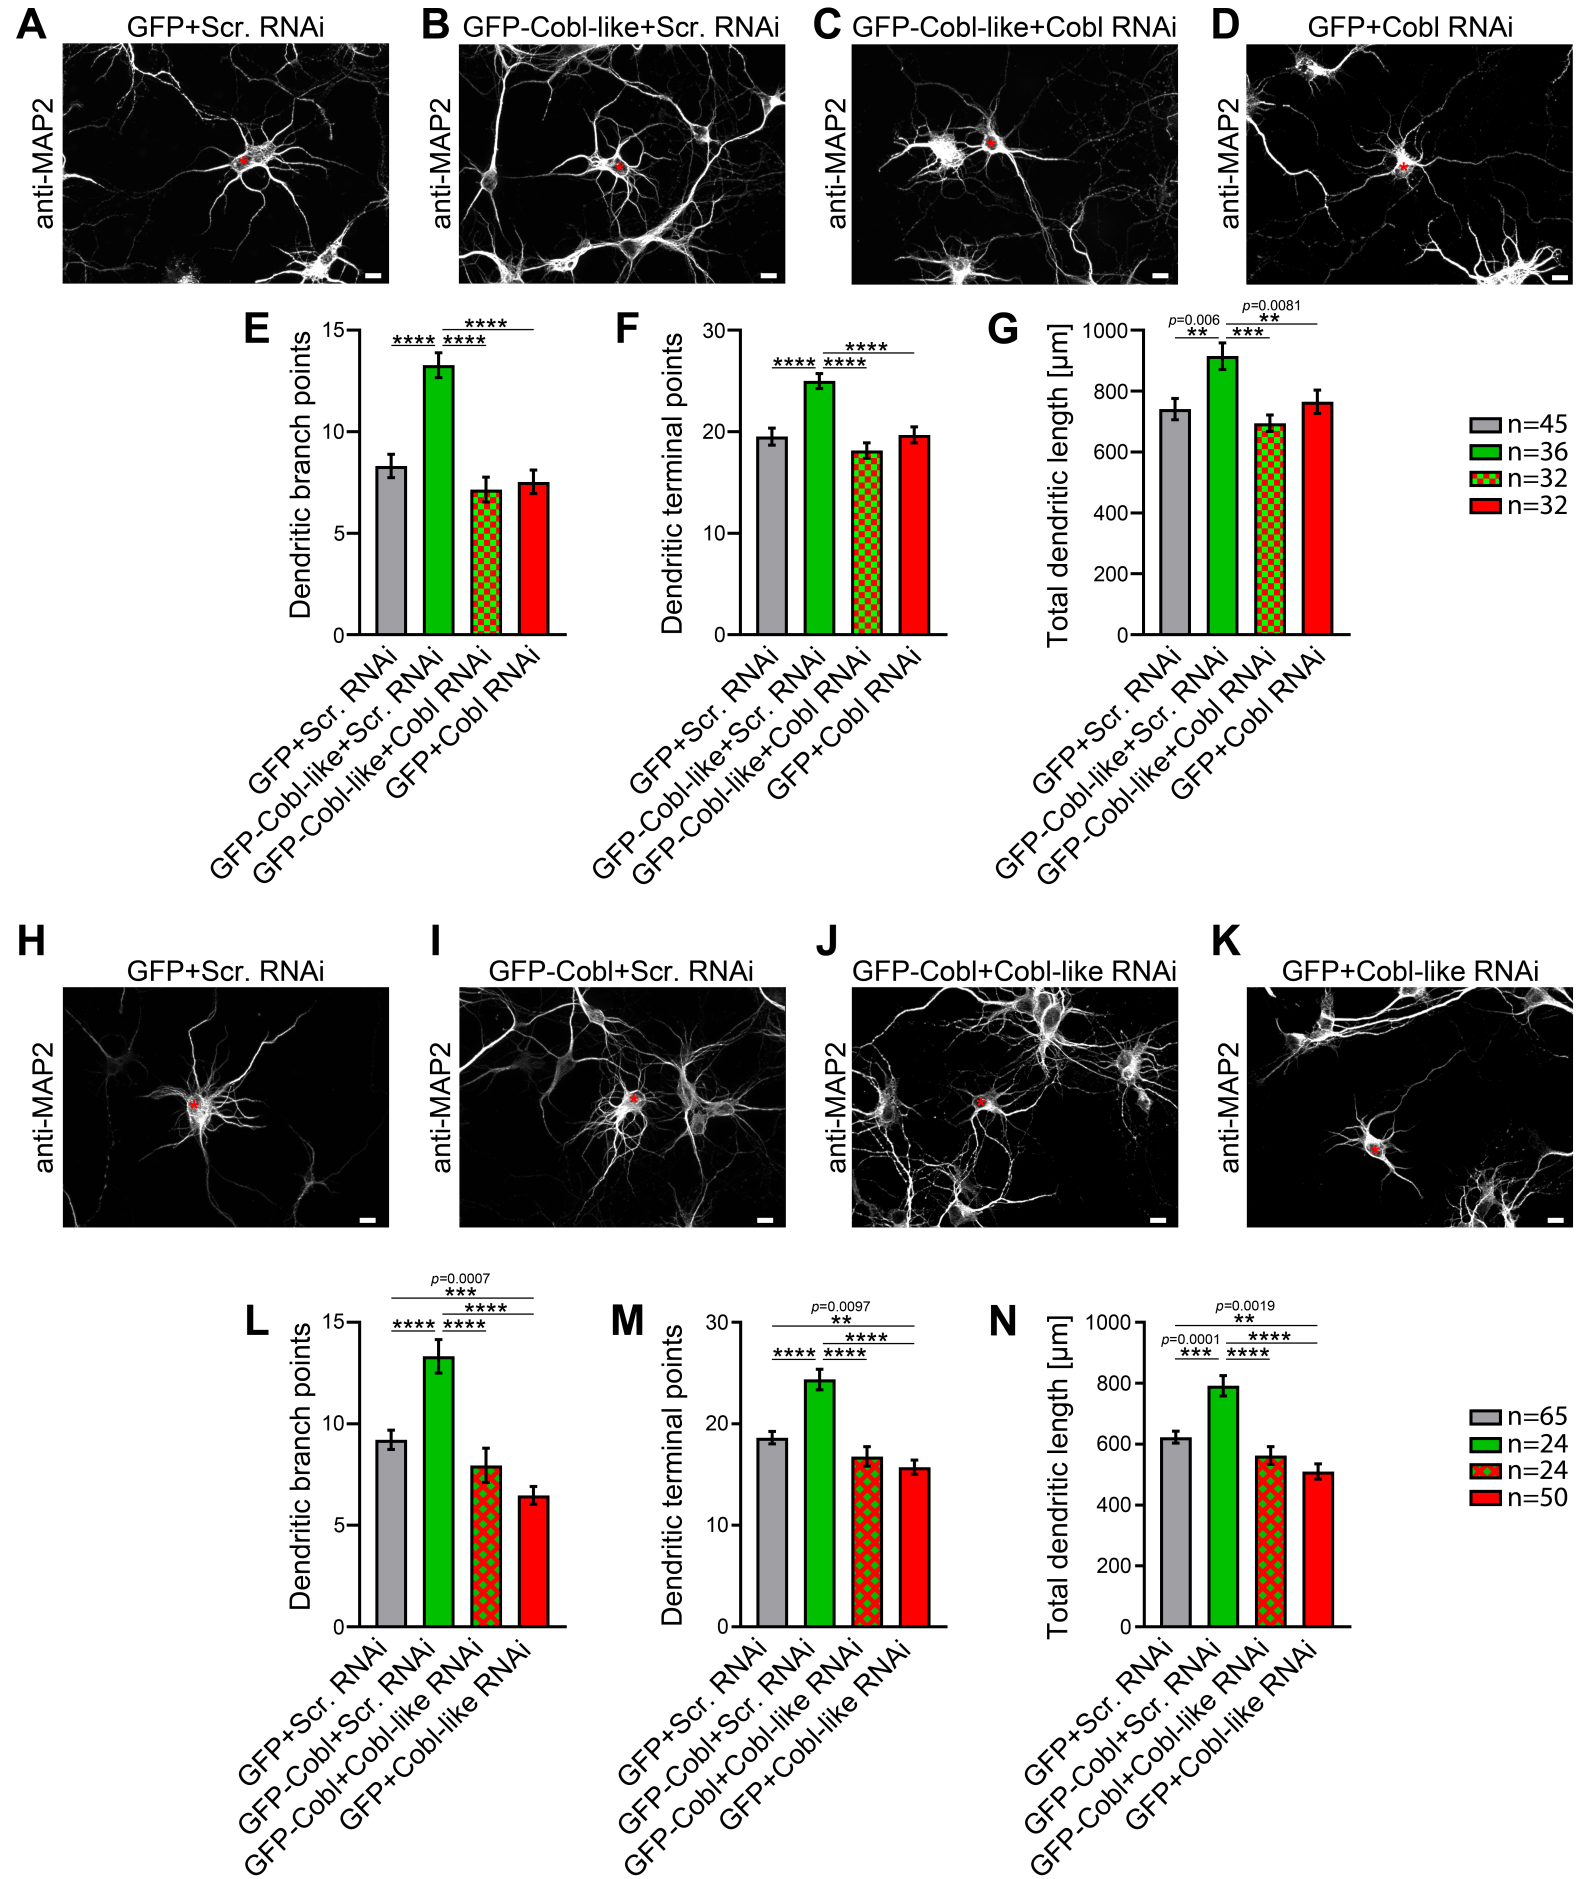

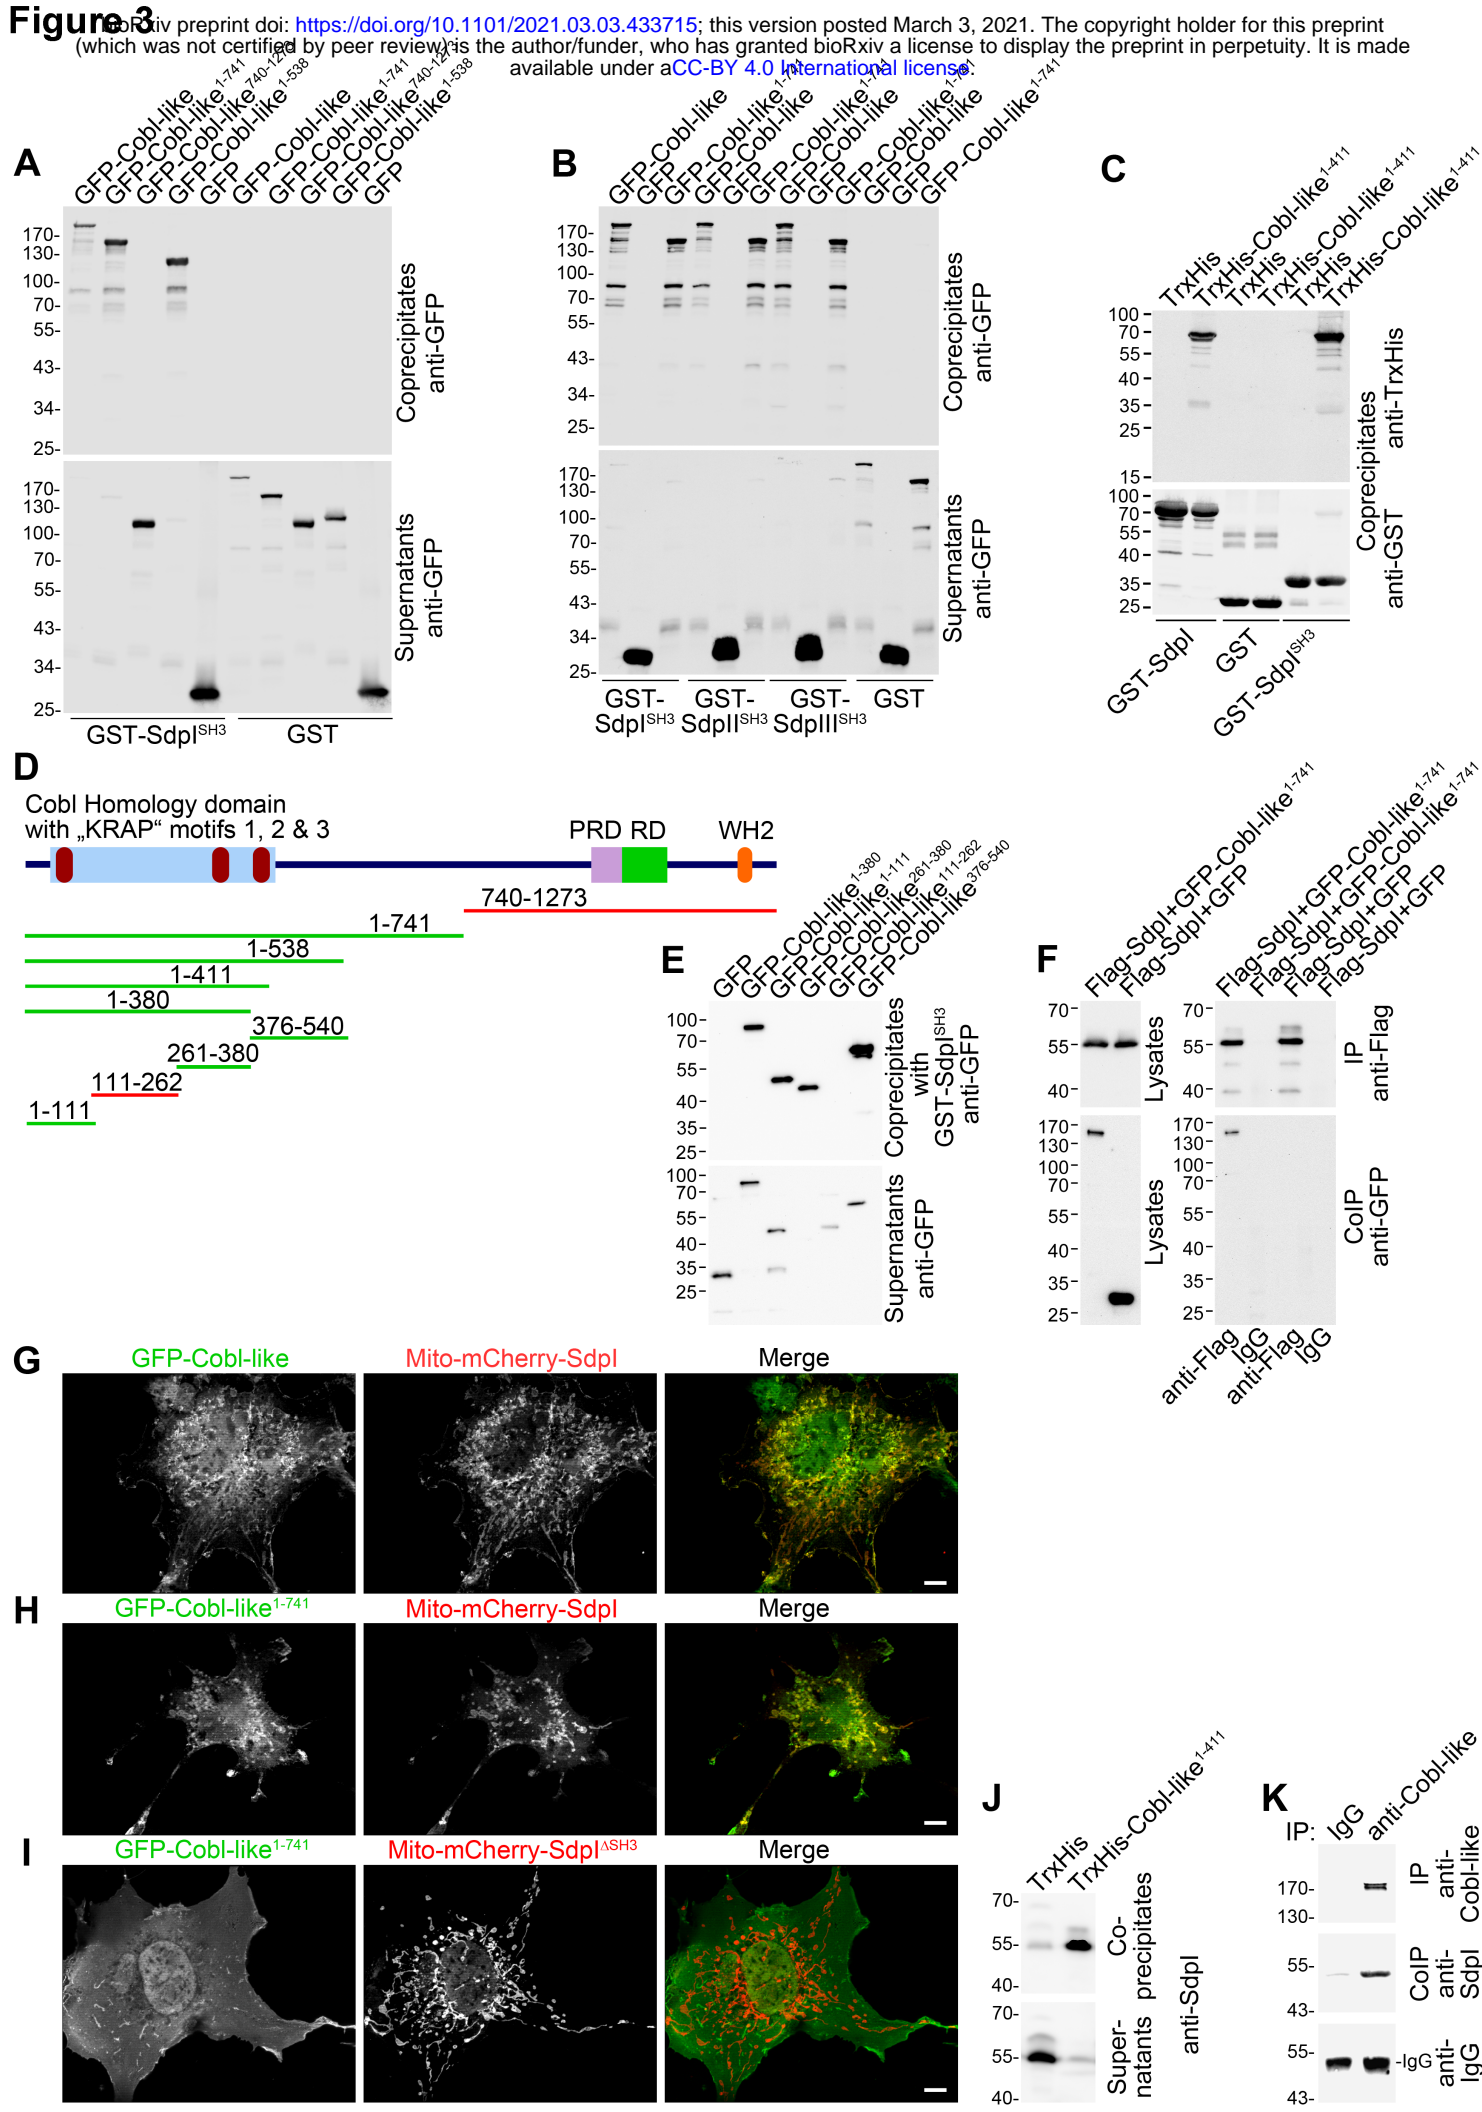



### Figure 3-figure supplement 1

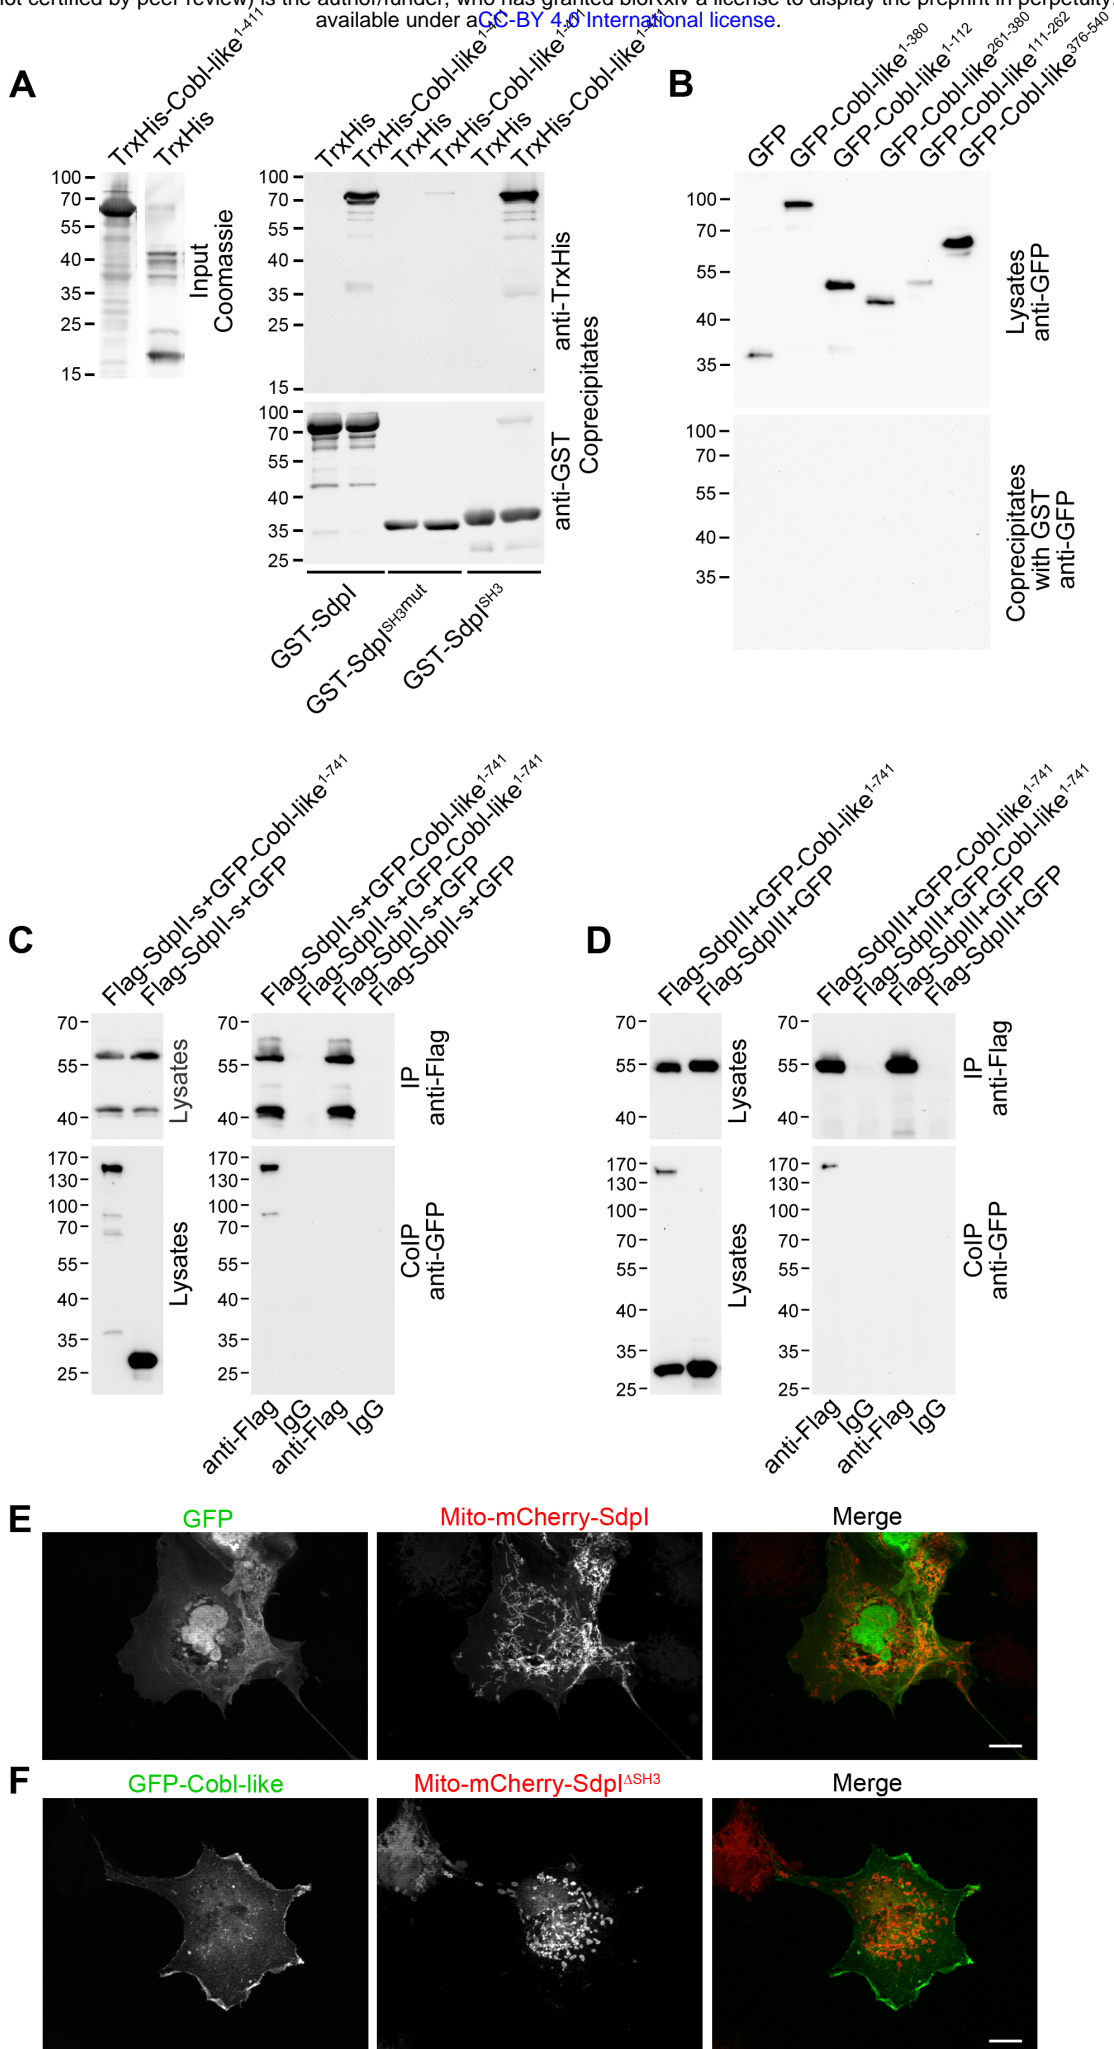

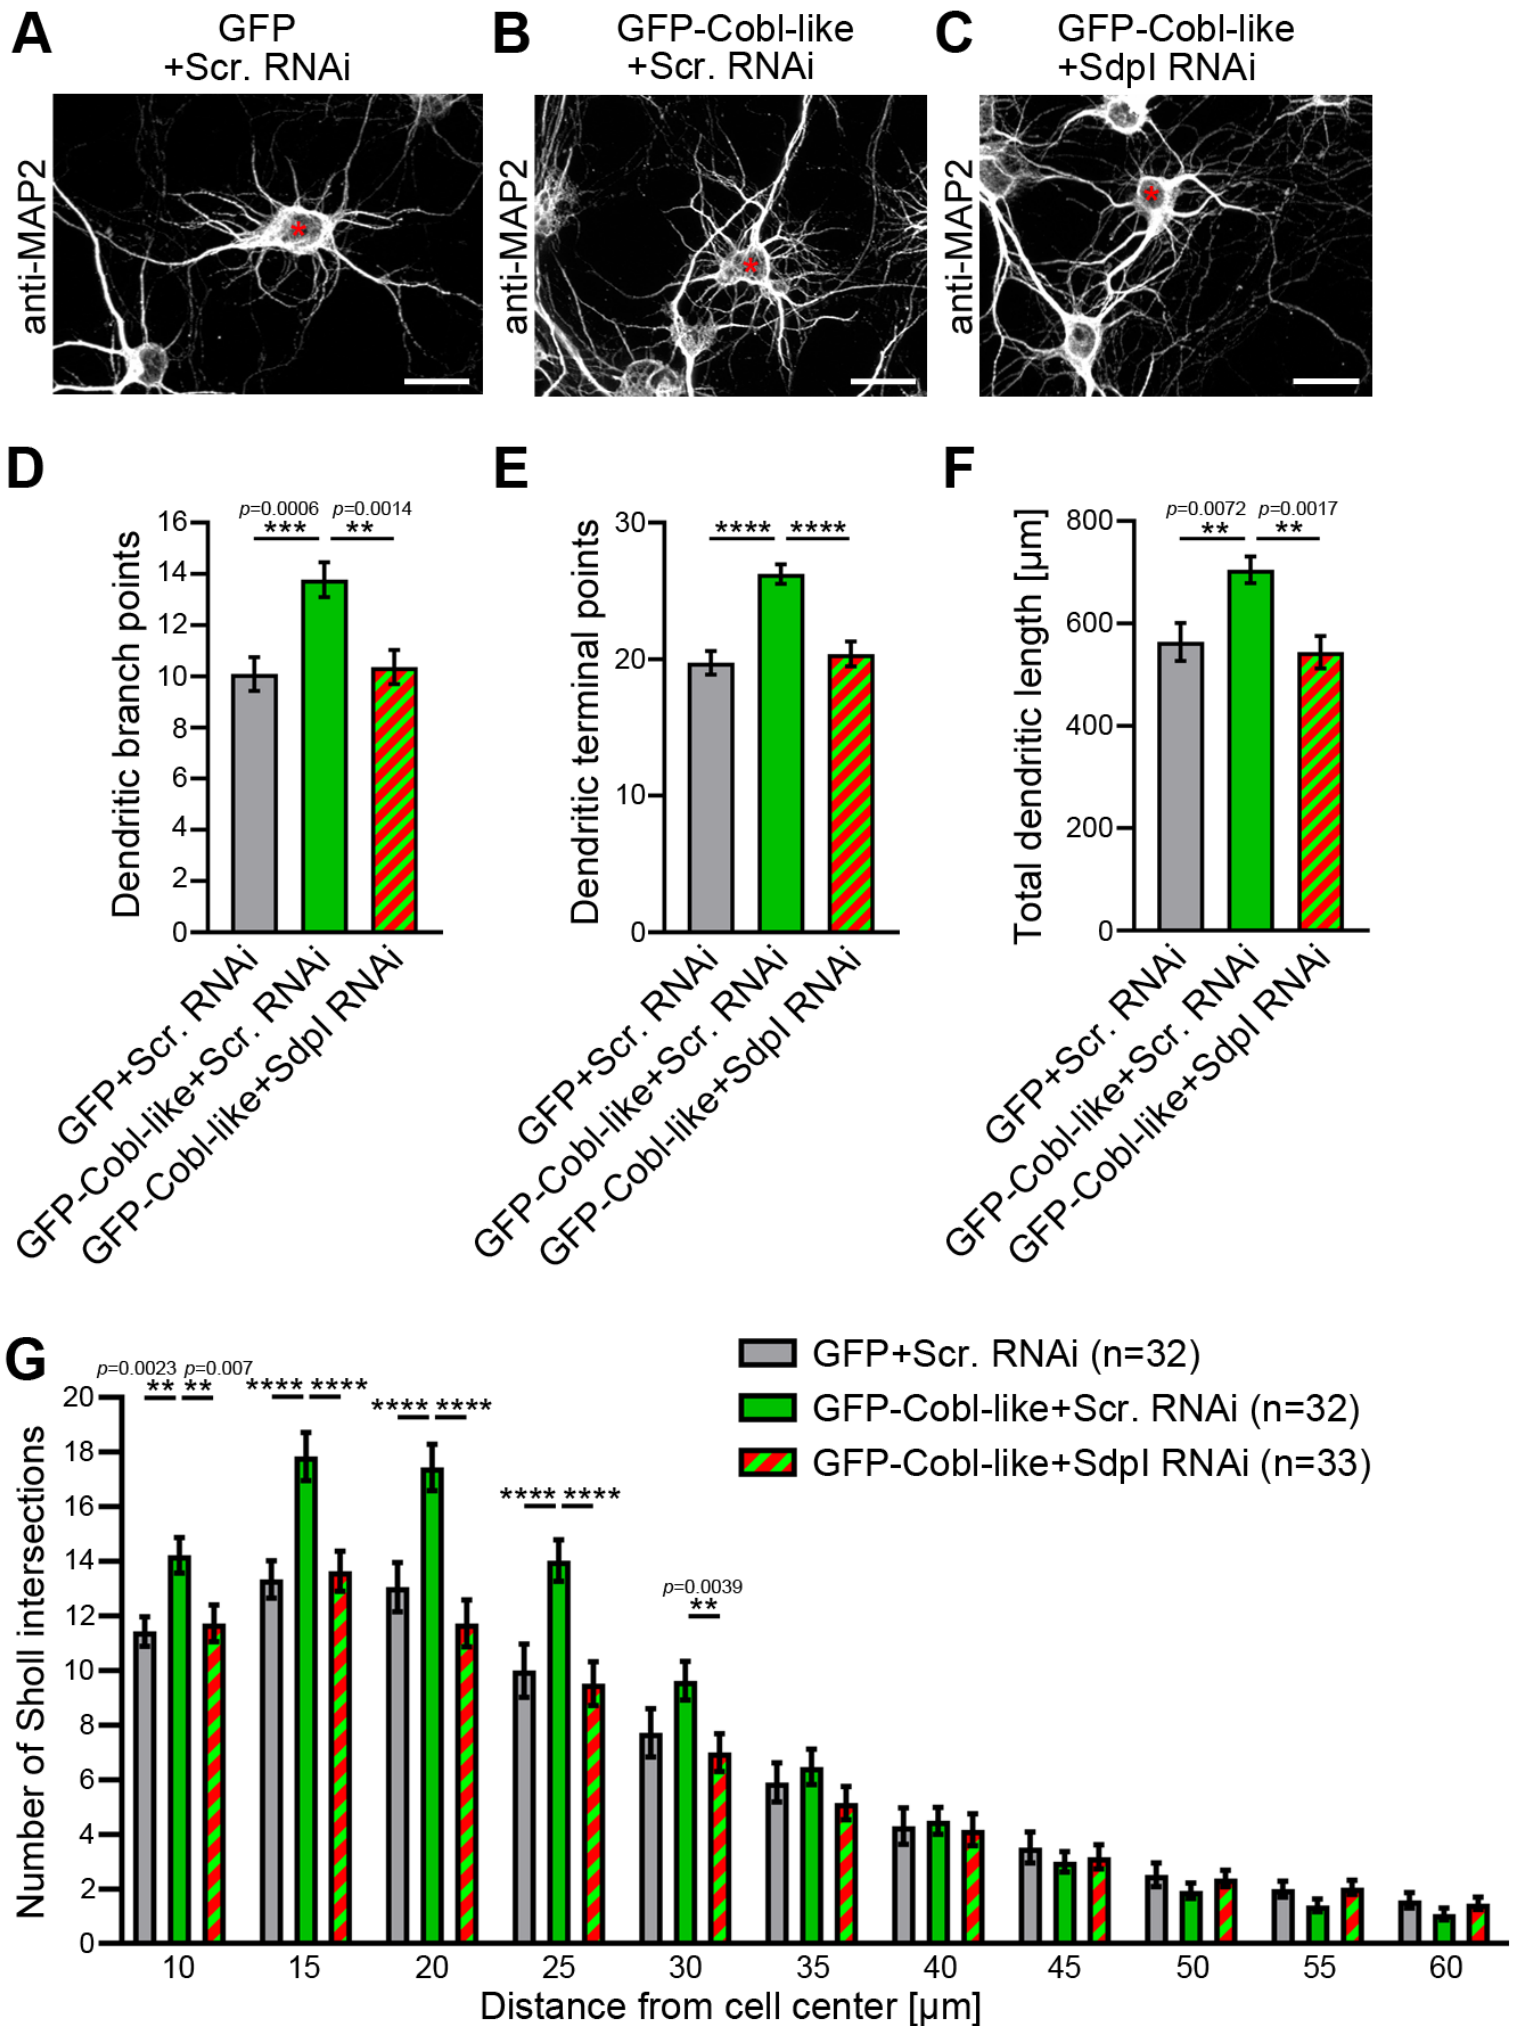

## Figure 5

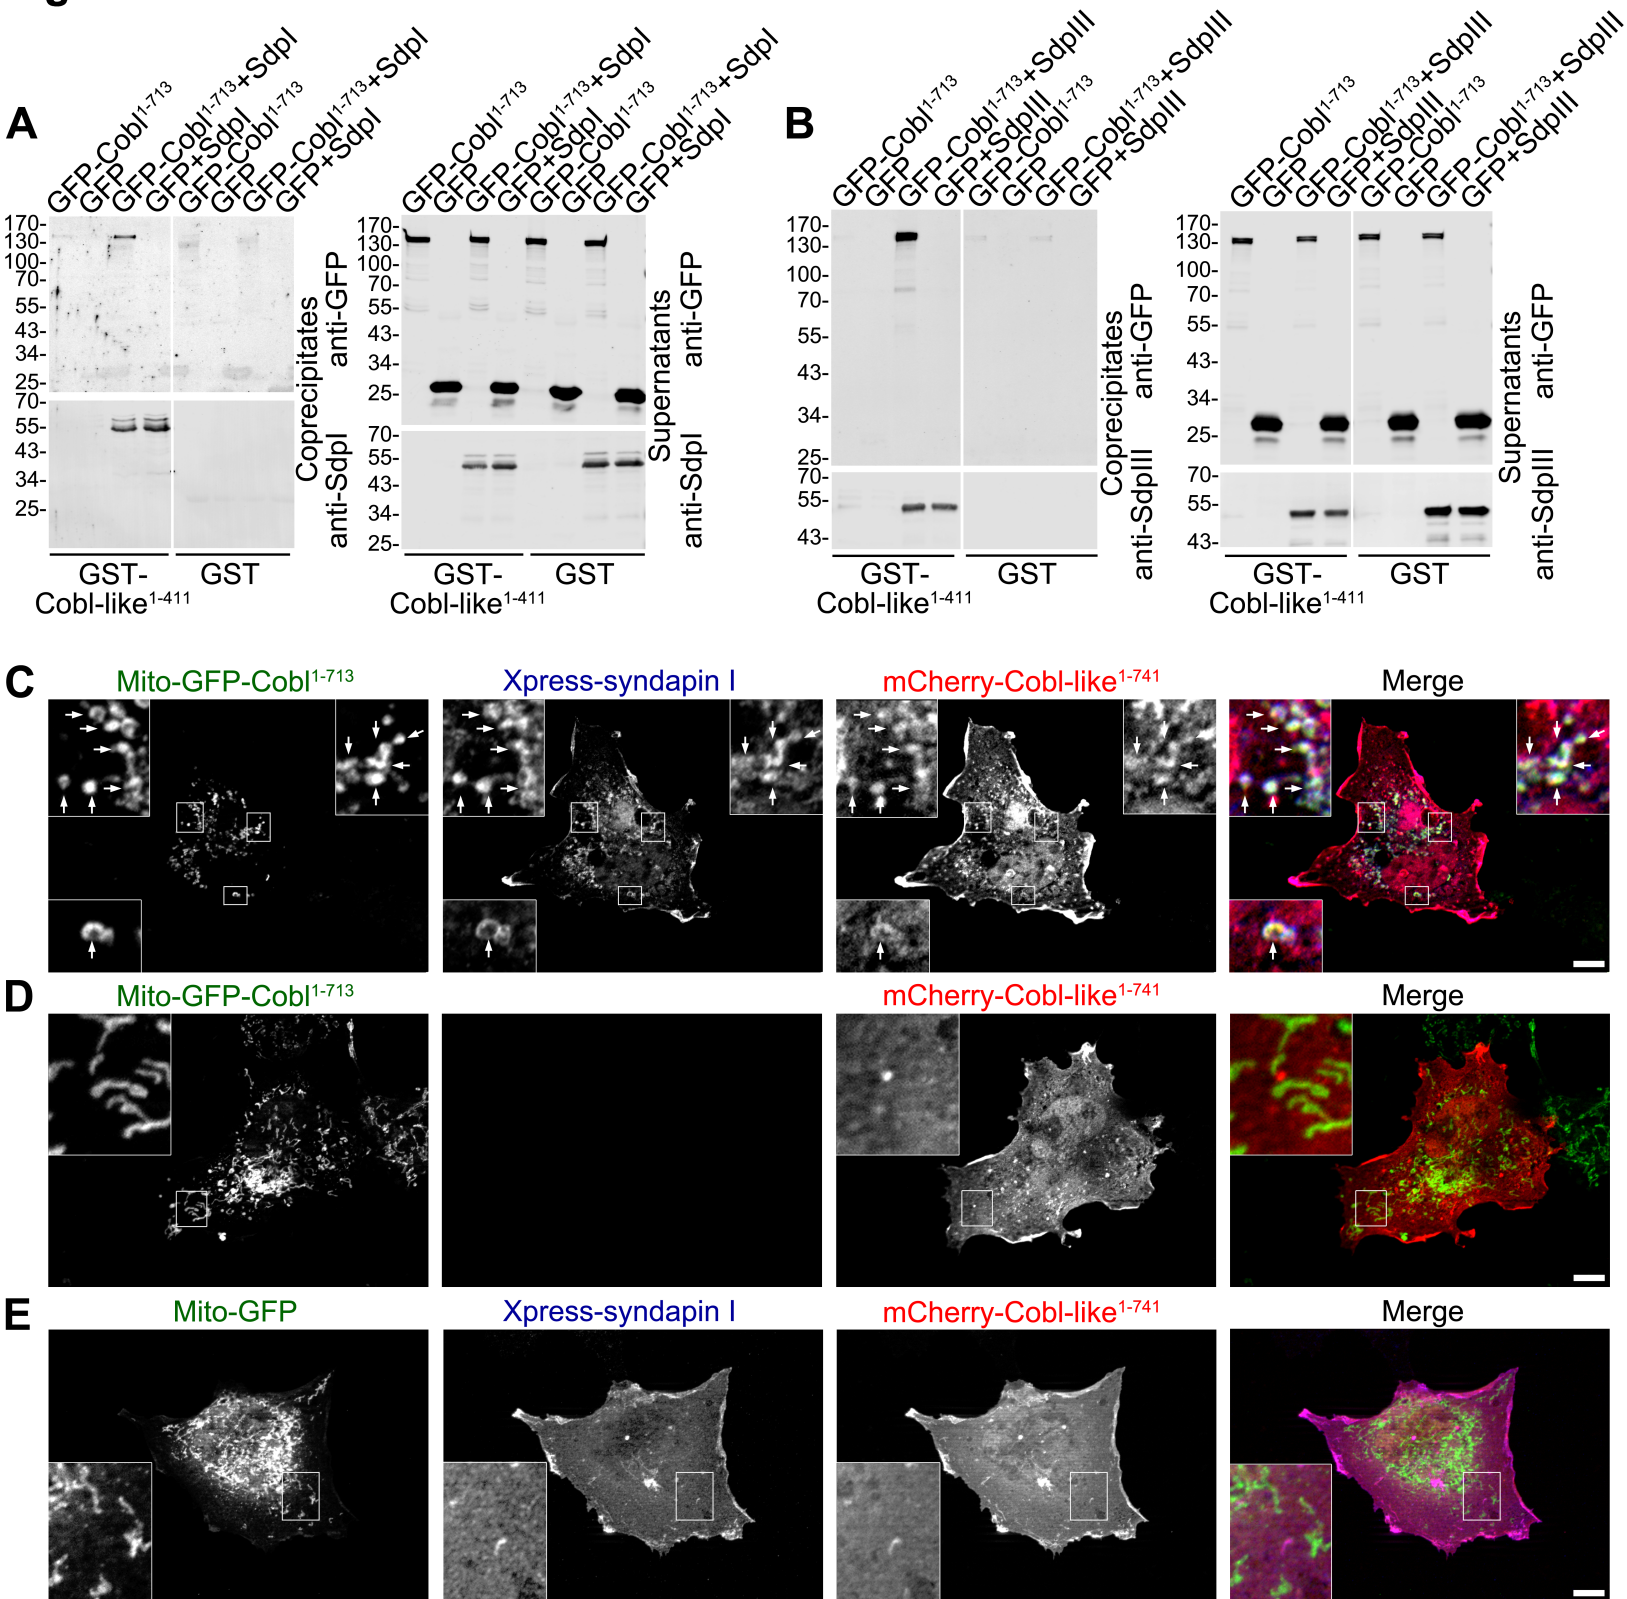

# Figure 5–figure supplement 1

Mito-GFP-Cobl<sup>1-713</sup>

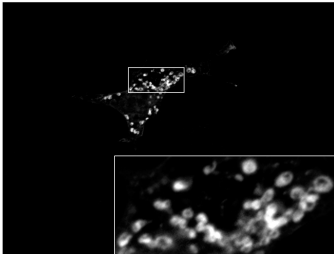

Xpress-syndapin I

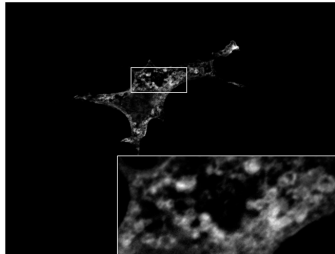

MitoTracker

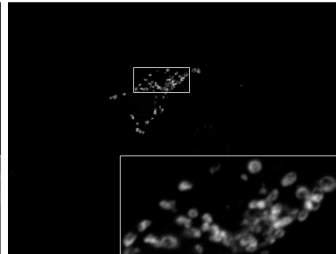

Merge

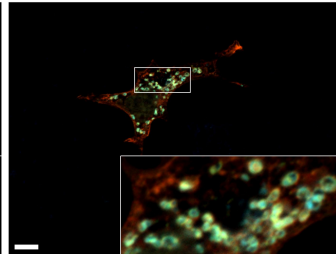

# Figure 6

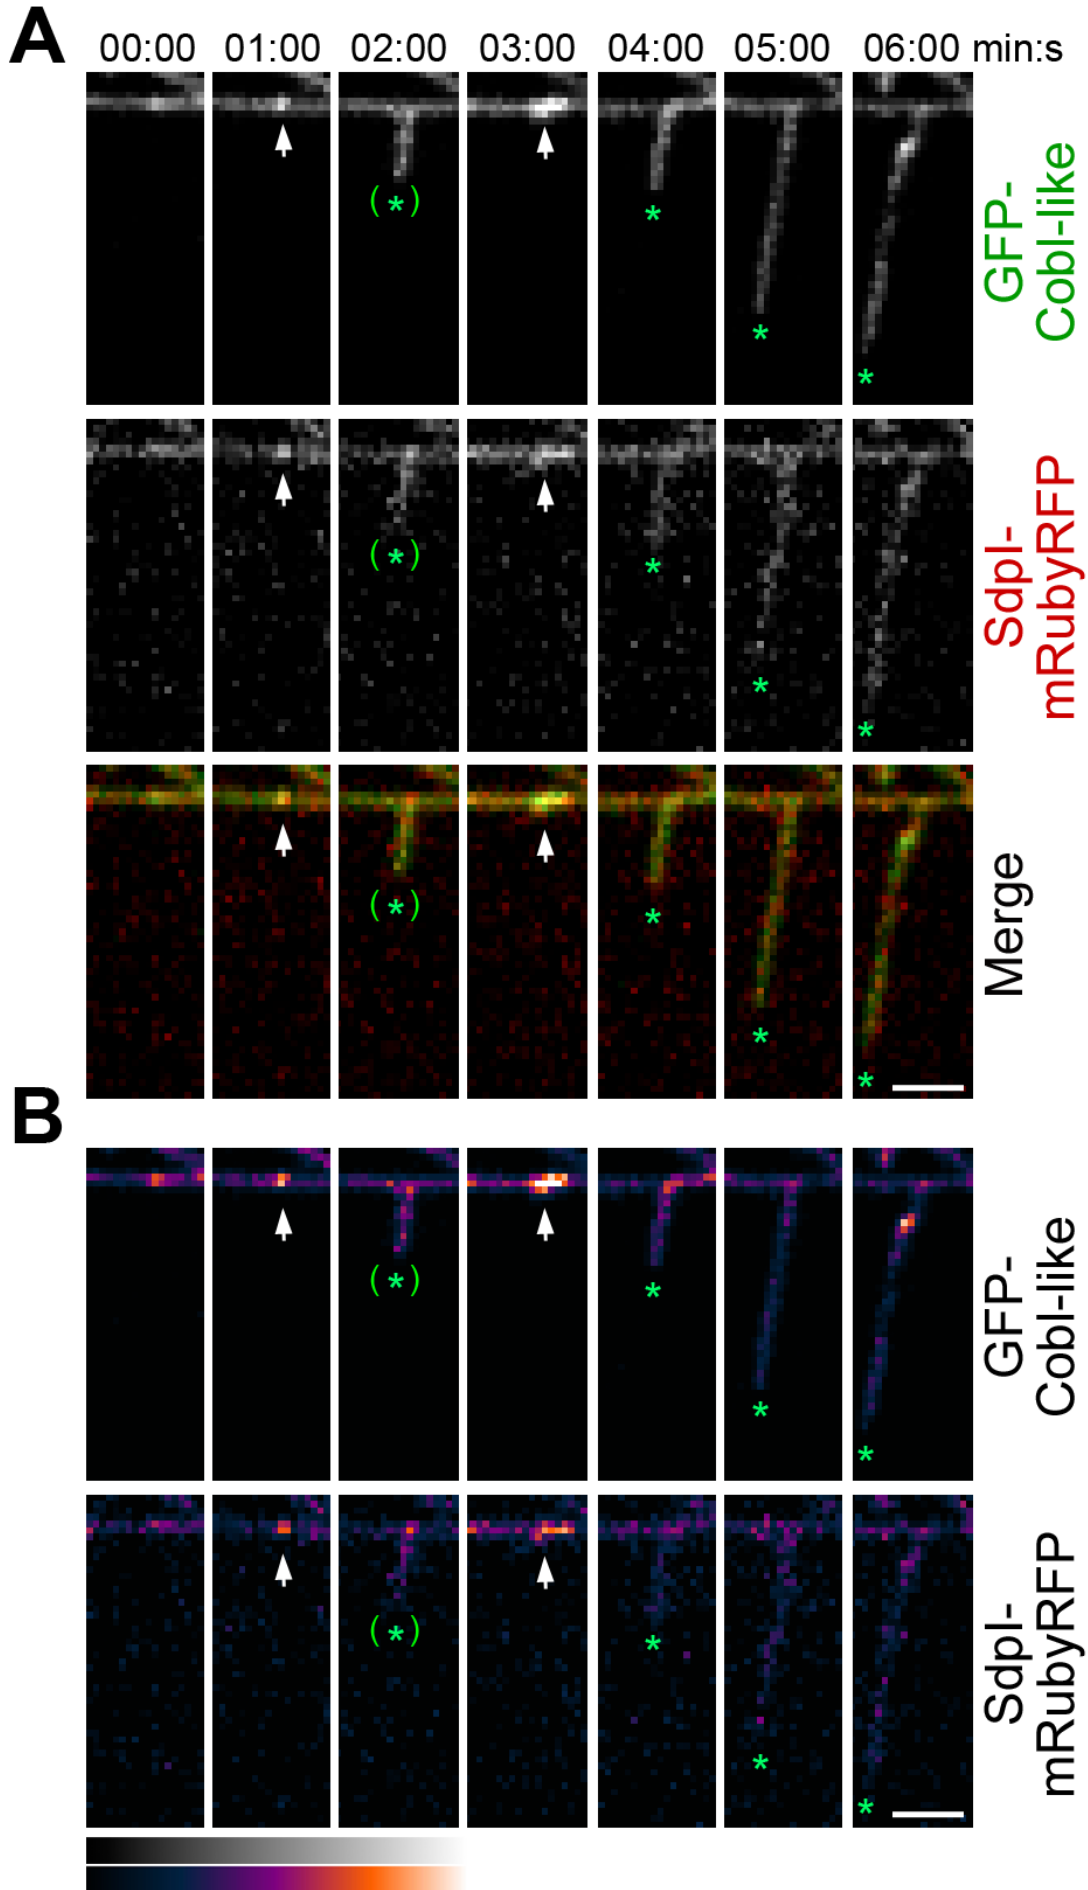

## Figure 7

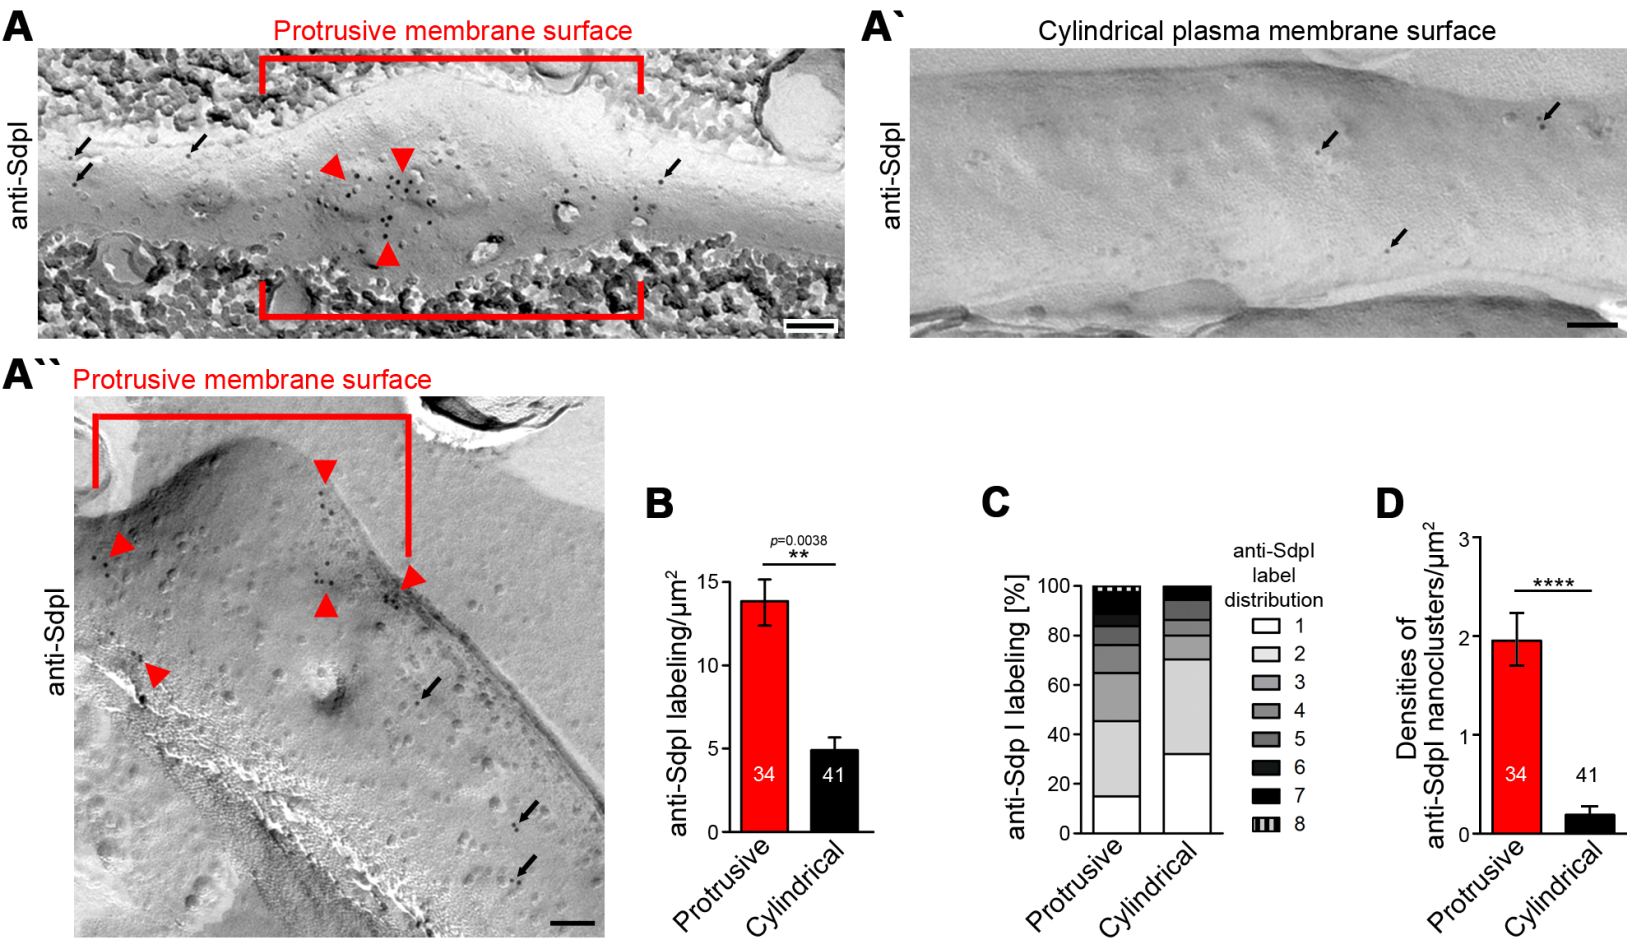

## Figure 8

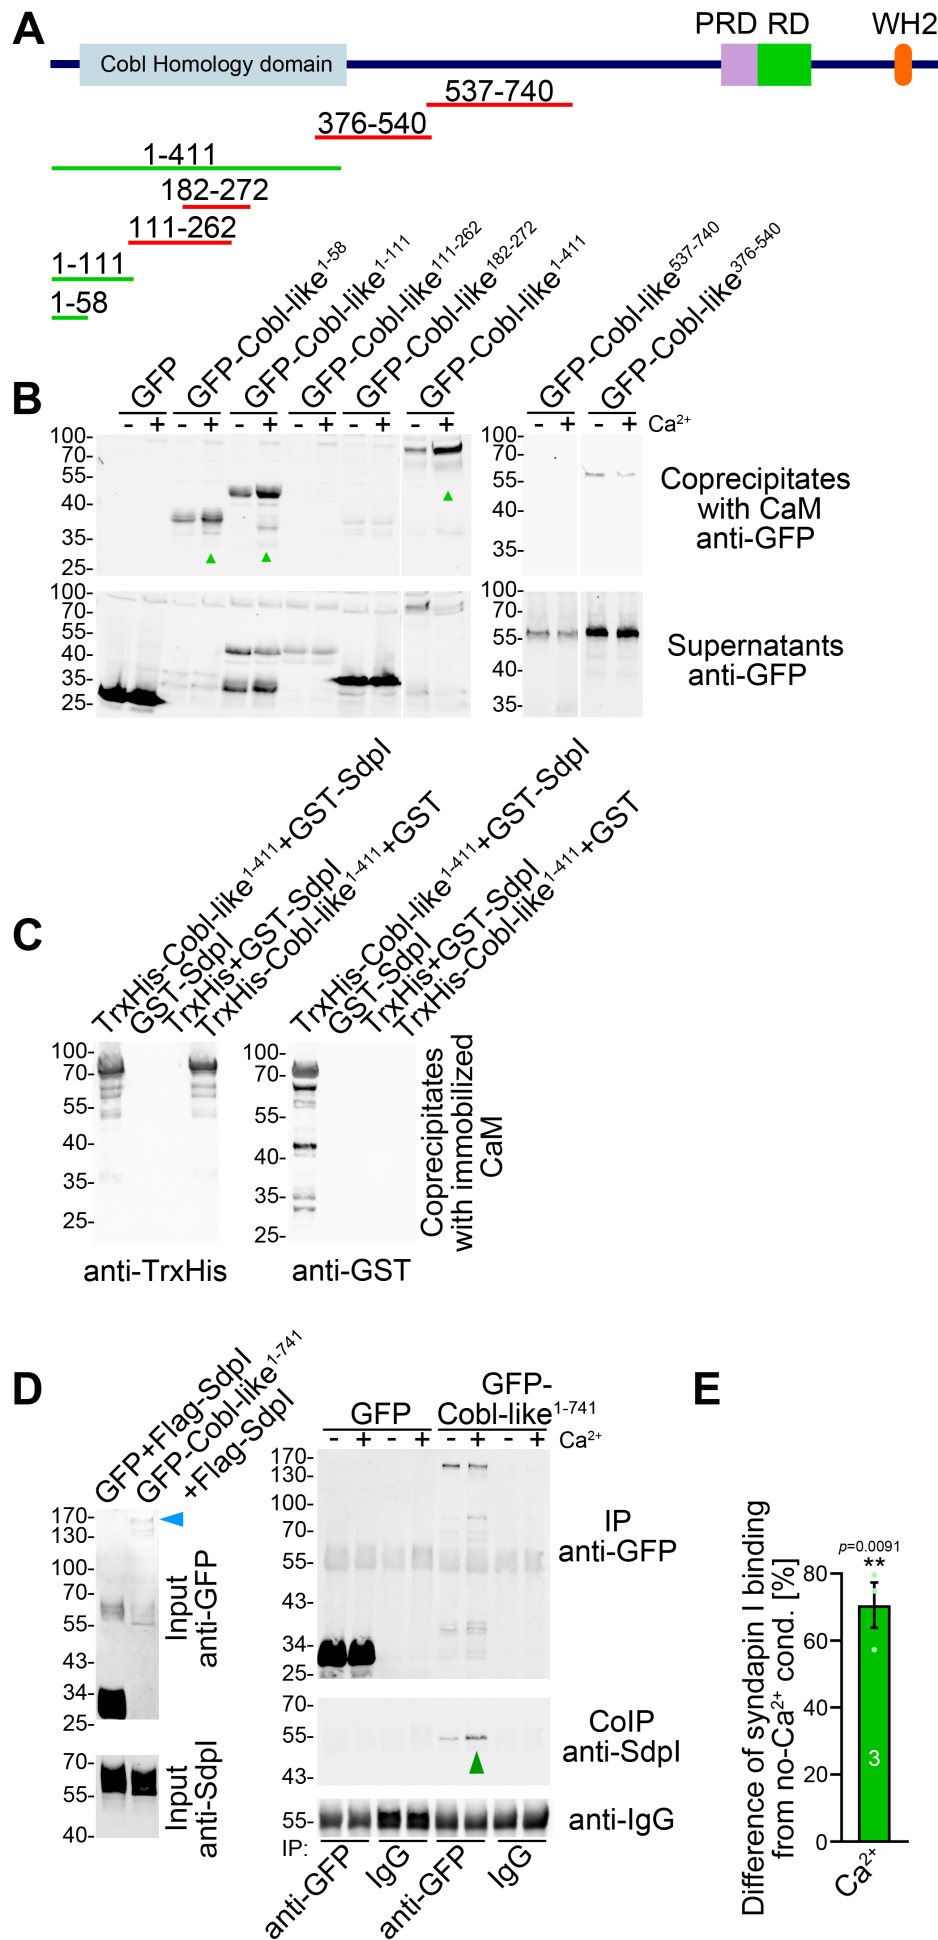

## Figure 9

**A**

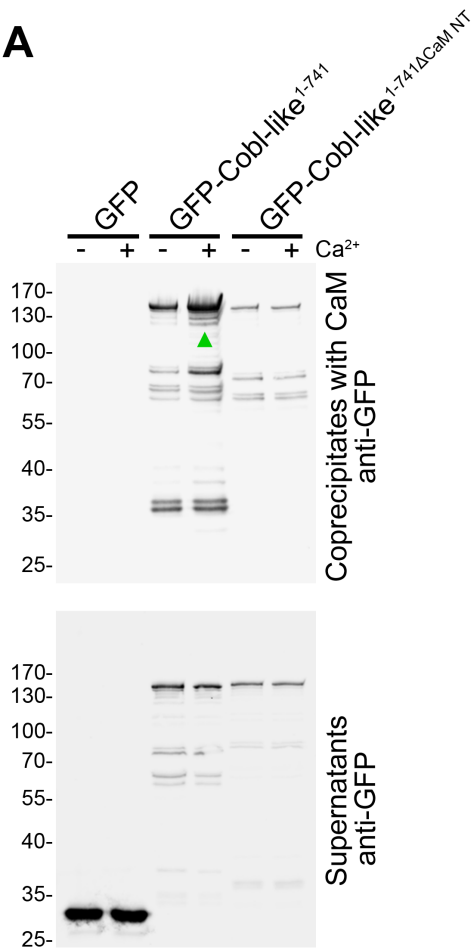

**B**

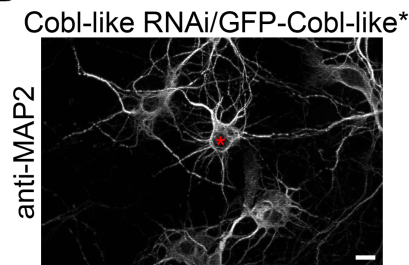

**C**

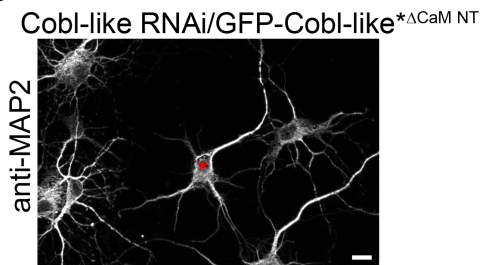

**D**

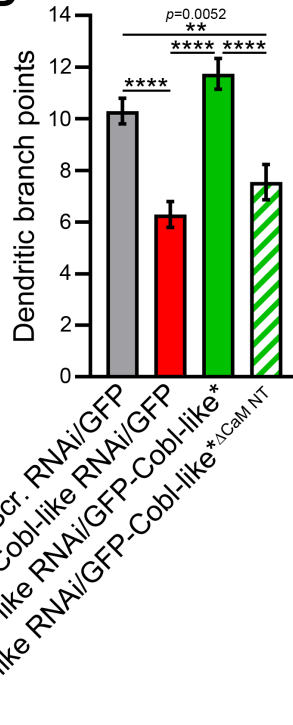

**E**

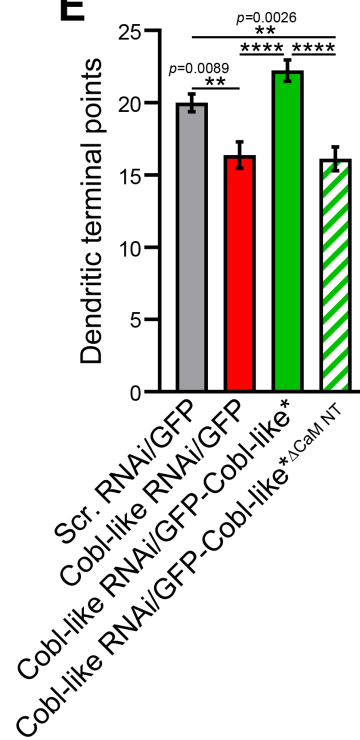

**F**

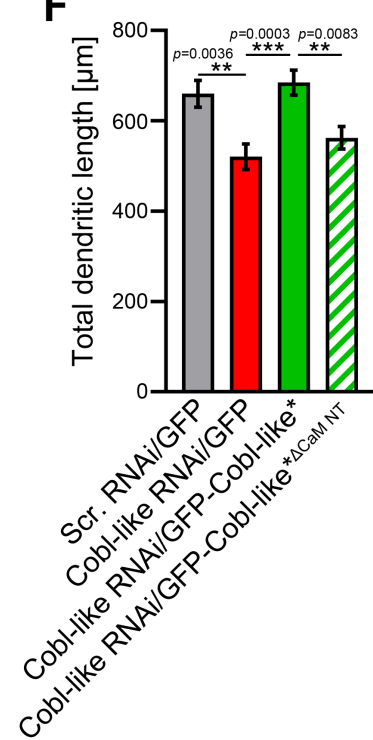

**G**

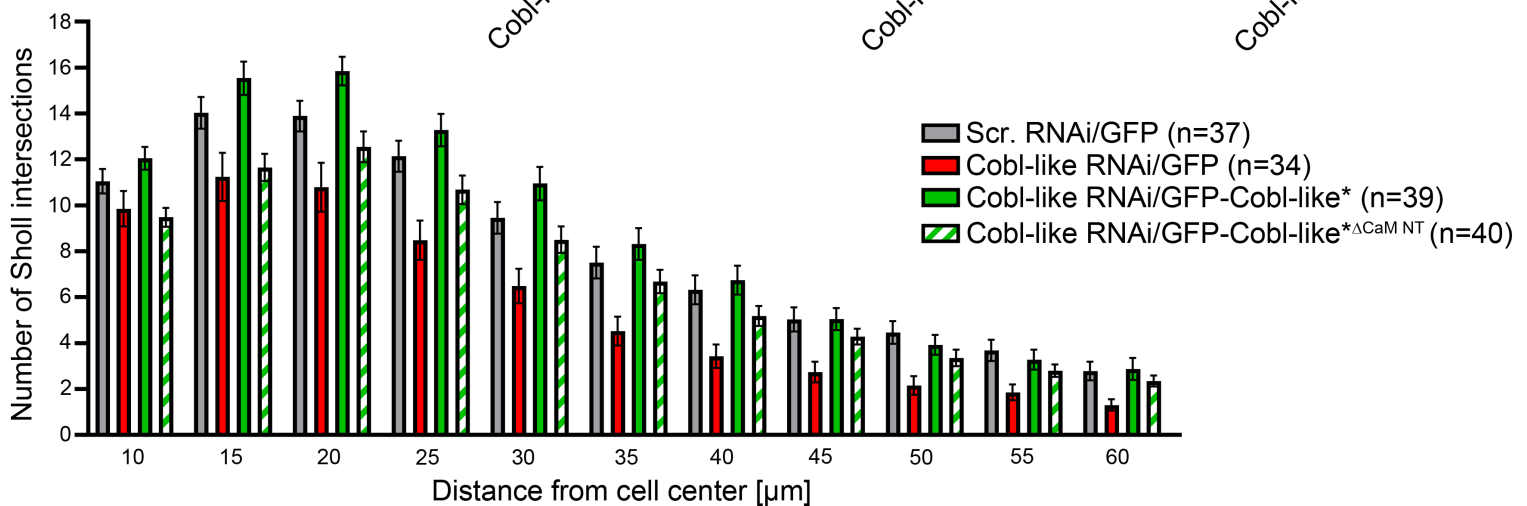

|                                                                                 | 10               | 15               | 20                | 25               | 30                | 35                | 40                | 45              | 50              |
|---------------------------------------------------------------------------------|------------------|------------------|-------------------|------------------|-------------------|-------------------|-------------------|-----------------|-----------------|
| Scr. RNAi/GFP vs. Cobl-like RNAi/GFP                                            | ns               | **<br>$p=0.0012$ | ***<br>$p=0.0002$ | ****             | ***<br>$p=0.0004$ | ***<br>$p=0.0004$ | ***<br>$p=0.0007$ | *<br>$p=0.0131$ | *<br>$p=0.0125$ |
| Scr. RNAi/GFP vs. Cobl-like RNAi/GFP-Cobl-like*                                 | ns               | ns               | *<br>$p=0.0411$   | ns               | ns                | ns                | ns                | ns              | ns              |
| Scr. RNAi/GFP vs. Cobl-like RNAi/GFP-Cobl-like* $\Delta$ CaM NT                 | ns               | **<br>$p=0.0058$ | ns                | ns               | ns                | ns                | ns                | ns              | ns              |
| Cobl-like RNAi/GFP vs. Cobl-like RNAi/GFP-Cobl-like*                            | *<br>$p=0.018$   | ****             | ****              | ****             | ****              | ****              | ****              | *<br>$p=0.0105$ | ns              |
| Cobl-like RNAi/GFP vs. Cobl-like RNAi/GFP-Cobl-like* $\Delta$ CaM NT            | ns               | ns               | ns                | *<br>$p=0.017$   | *<br>$p=0.0367$   | *<br>$p=0.0203$   | ns                | ns              | ns              |
| Cobl-like RNAi/GFP-Cobl-like* vs. Cobl-like RNAi/GFP-Cobl-like* $\Delta$ CaM NT | **<br>$p=0.0018$ | ****             | ****              | **<br>$p=0.0015$ | **<br>$p=0.0034$  | ns                | ns                | ns              | ns              |



# Figure 10

bioRxiv preprint doi: <https://doi.org/10.1101/2021.03.03.433715>; this version posted March 3, 2021. The copyright holder for this preprint (which was not certified by peer review) is the author/funder, who has granted bioRxiv a license to display the preprint in perpetuity. It is made available under aCC-BY 4.0 International license.

**A**

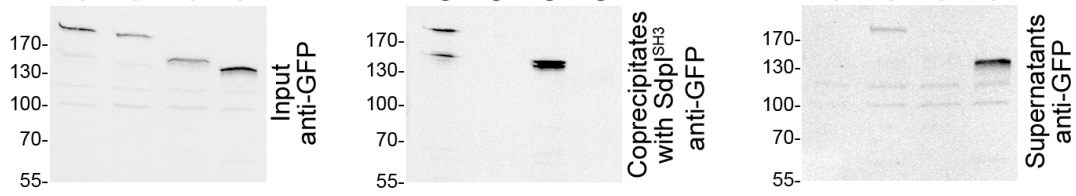

**B**

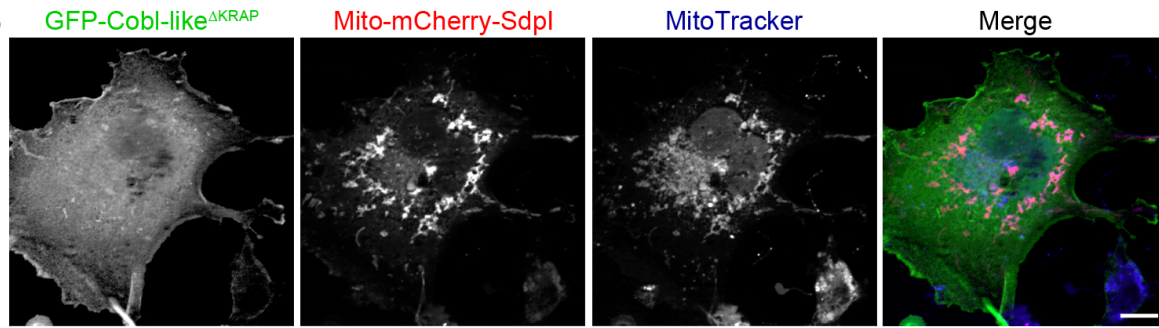

**C**

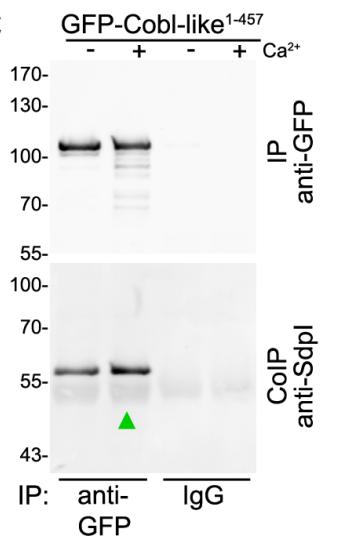

**D**

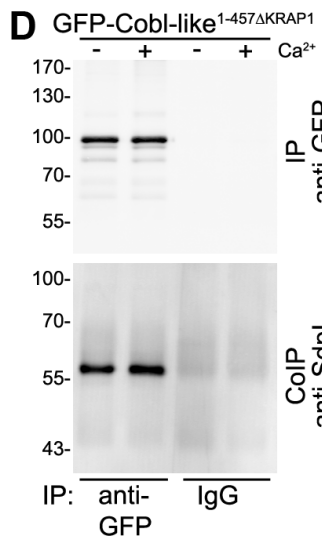

**E**

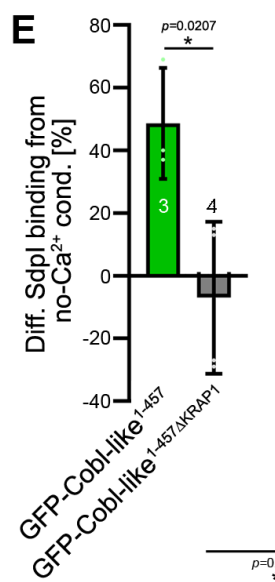

**F**

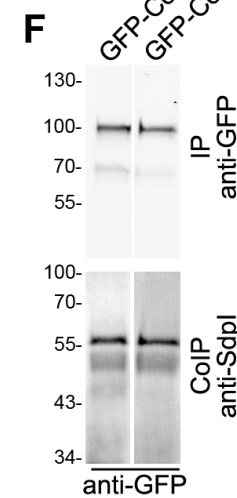

**G**

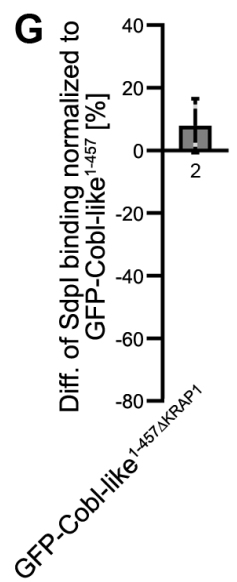

**H**

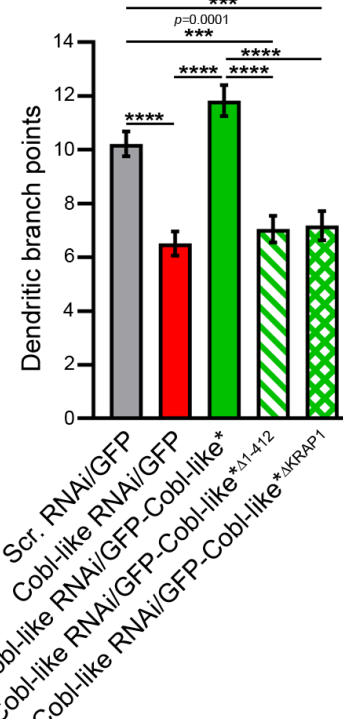

**I**

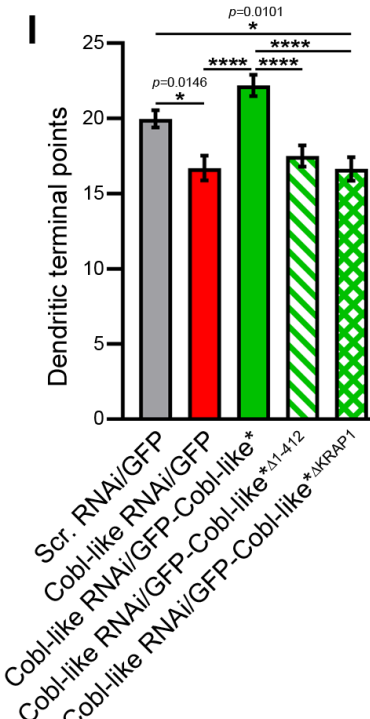

**J**

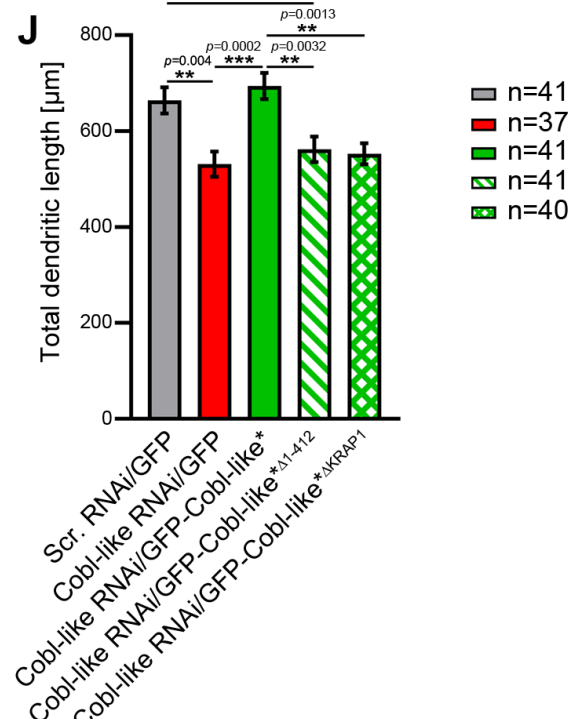

## Figure 10–figure supplement 1

**A**

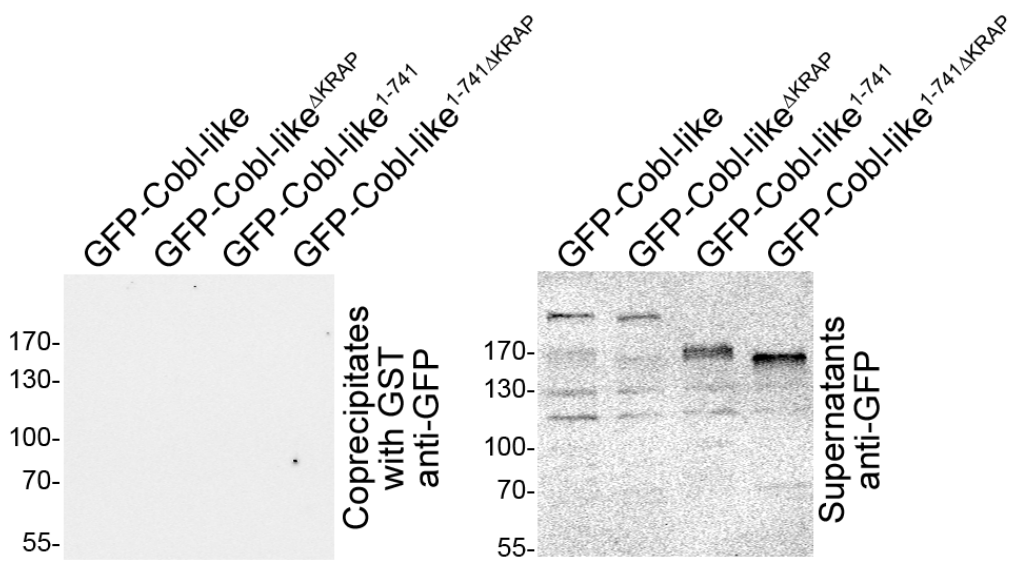

**B**

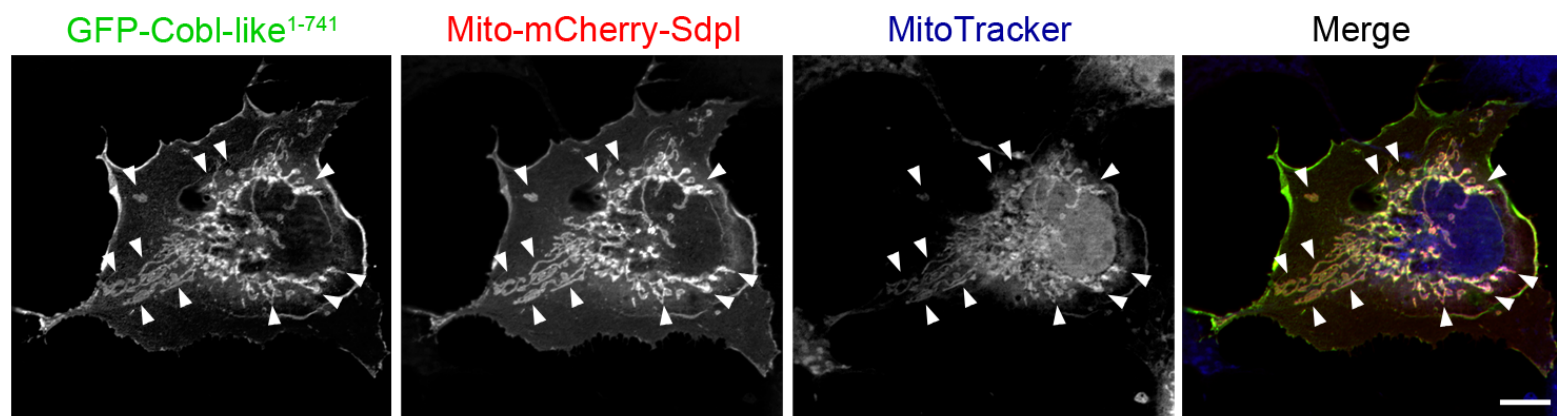

**C**

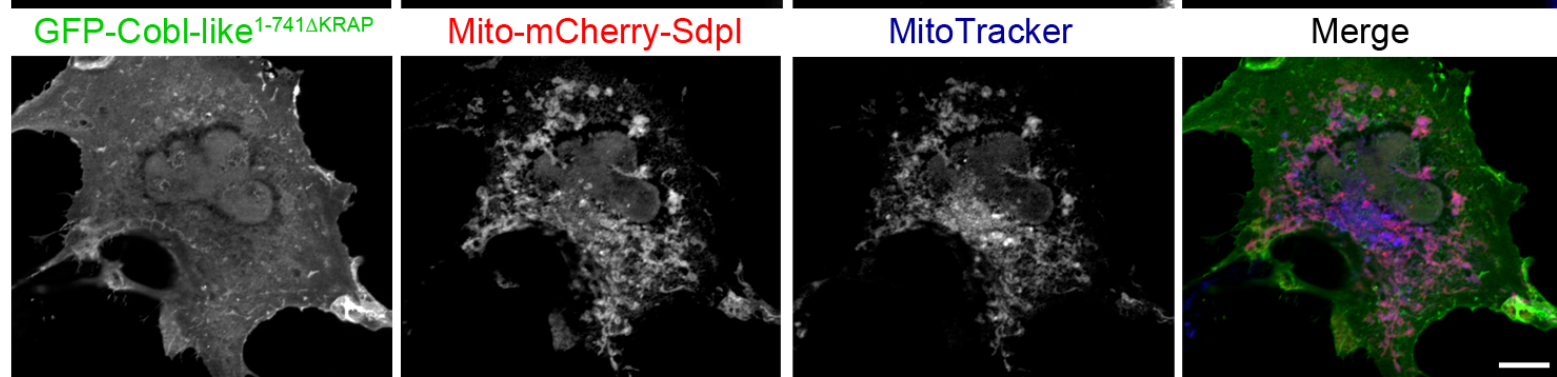

Figure 11

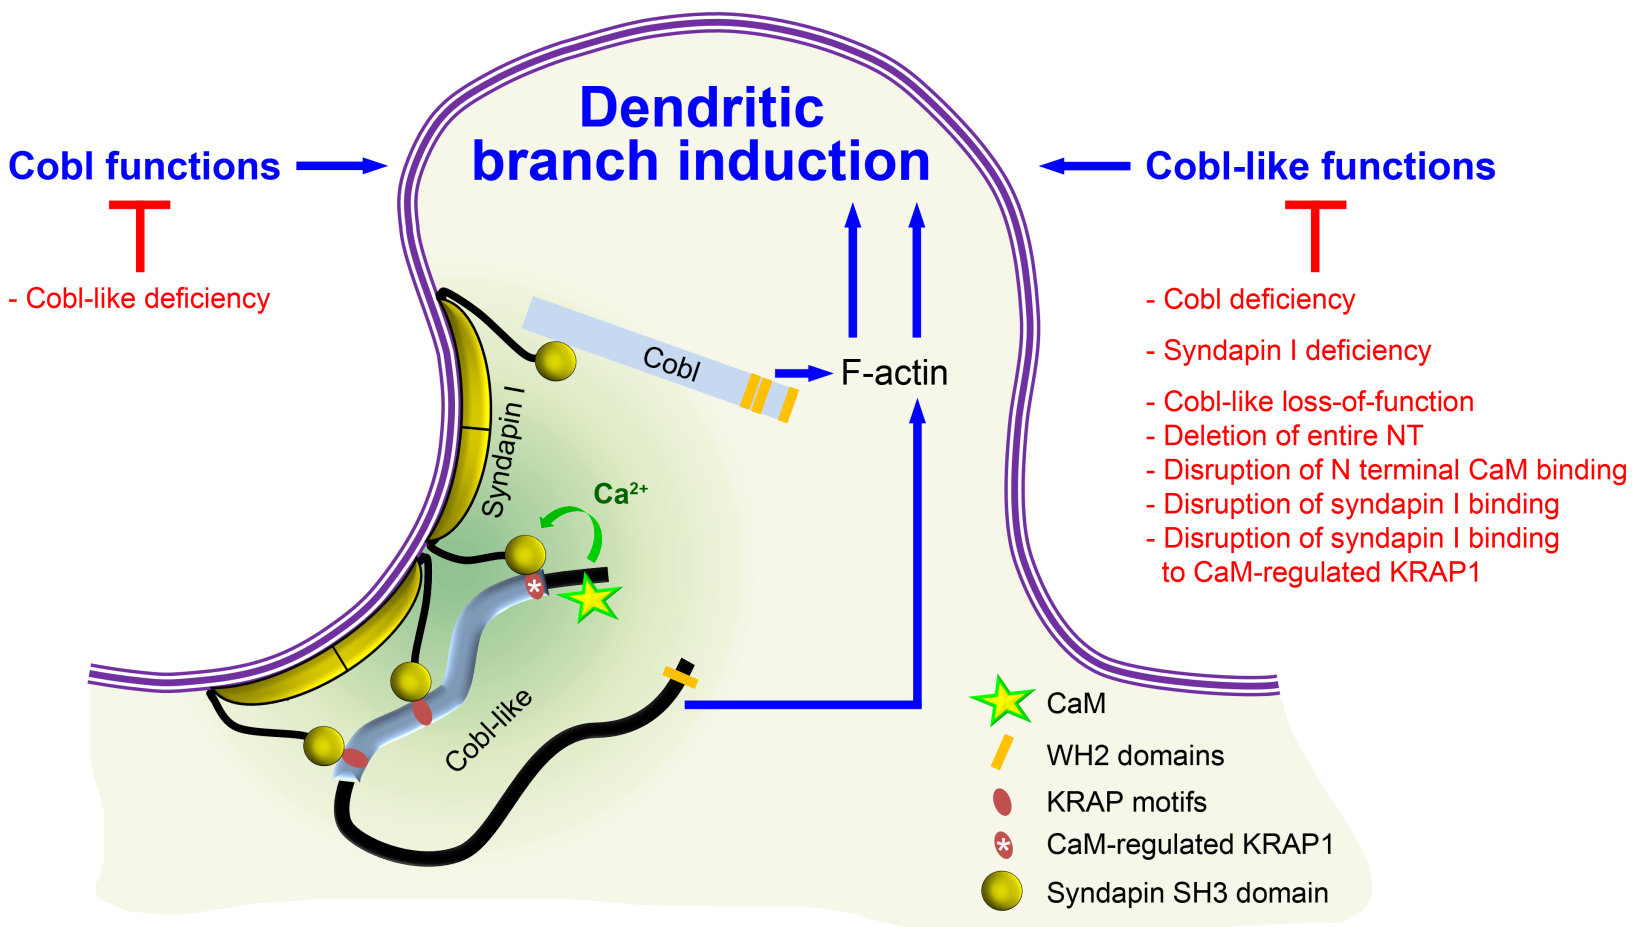

Source: http://biorxiv.org/content/10.1101/2021.03.03.433715v1.full.pdf
